# Supplementary material for: Isocorydine Derivatives and Their Anticancer Activities
Source: PubMed Central journal article supplement (PMC6271052; doi:10.3390/molecules190812099), 2014-08-12
Supplement: molecules-19-12099-s001.pdf [file molecules-19-12099-s001.pdf]

## Supplementary

**Figure S1.** Inhibitory effect of isocorydione (**2**) on murine sarcoma S<sub>180</sub>-bearing mice (A, blank control group; B, 50 mg/kg group; C, 100 mg/kg group; D, 200 mg/kg group; E, CTX group).

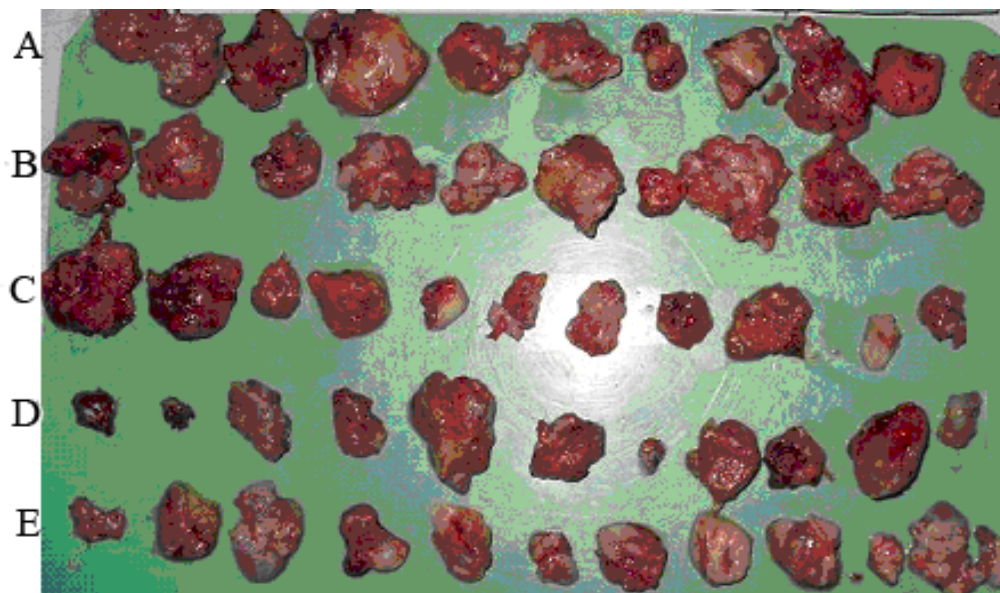

**Figure S2.** Inhibitory effect of 8-acetamino-isocorydine (**11**) on murine sarcoma S<sub>180</sub>-bearing mice (A, blank control group; B, CTX group; C, 50 mg/kg group; D, 100 mg/kg group; E, 200 mg/kg group).

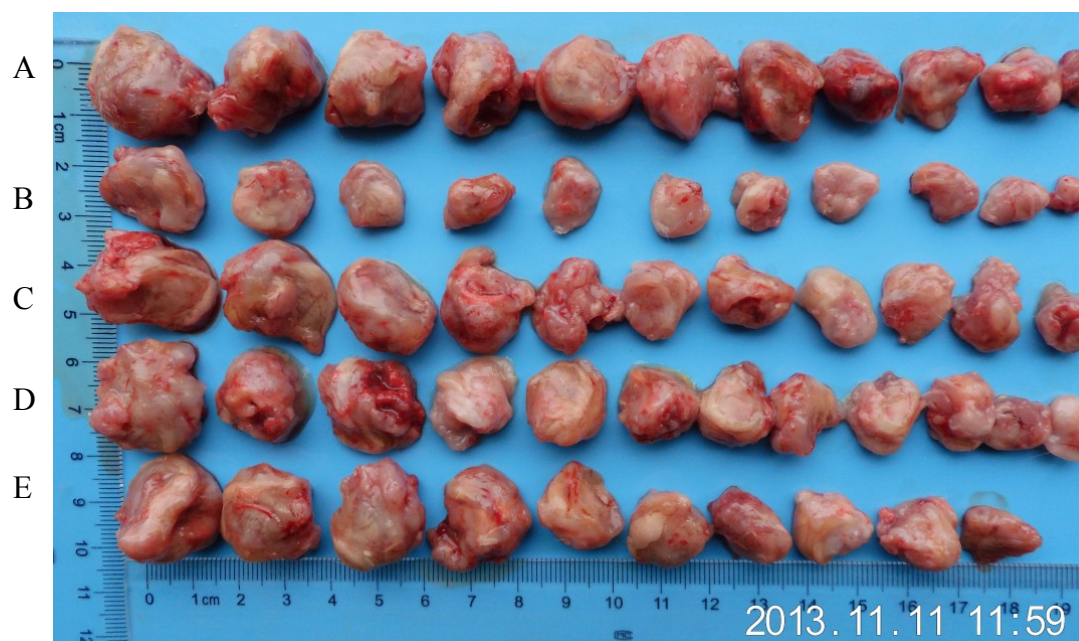

Figure S3.  $^1\text{H-NMR}$  (400 MHz,  $\text{CD}_3\text{COCD}_3$ ) spectra of isocorydine (**1**).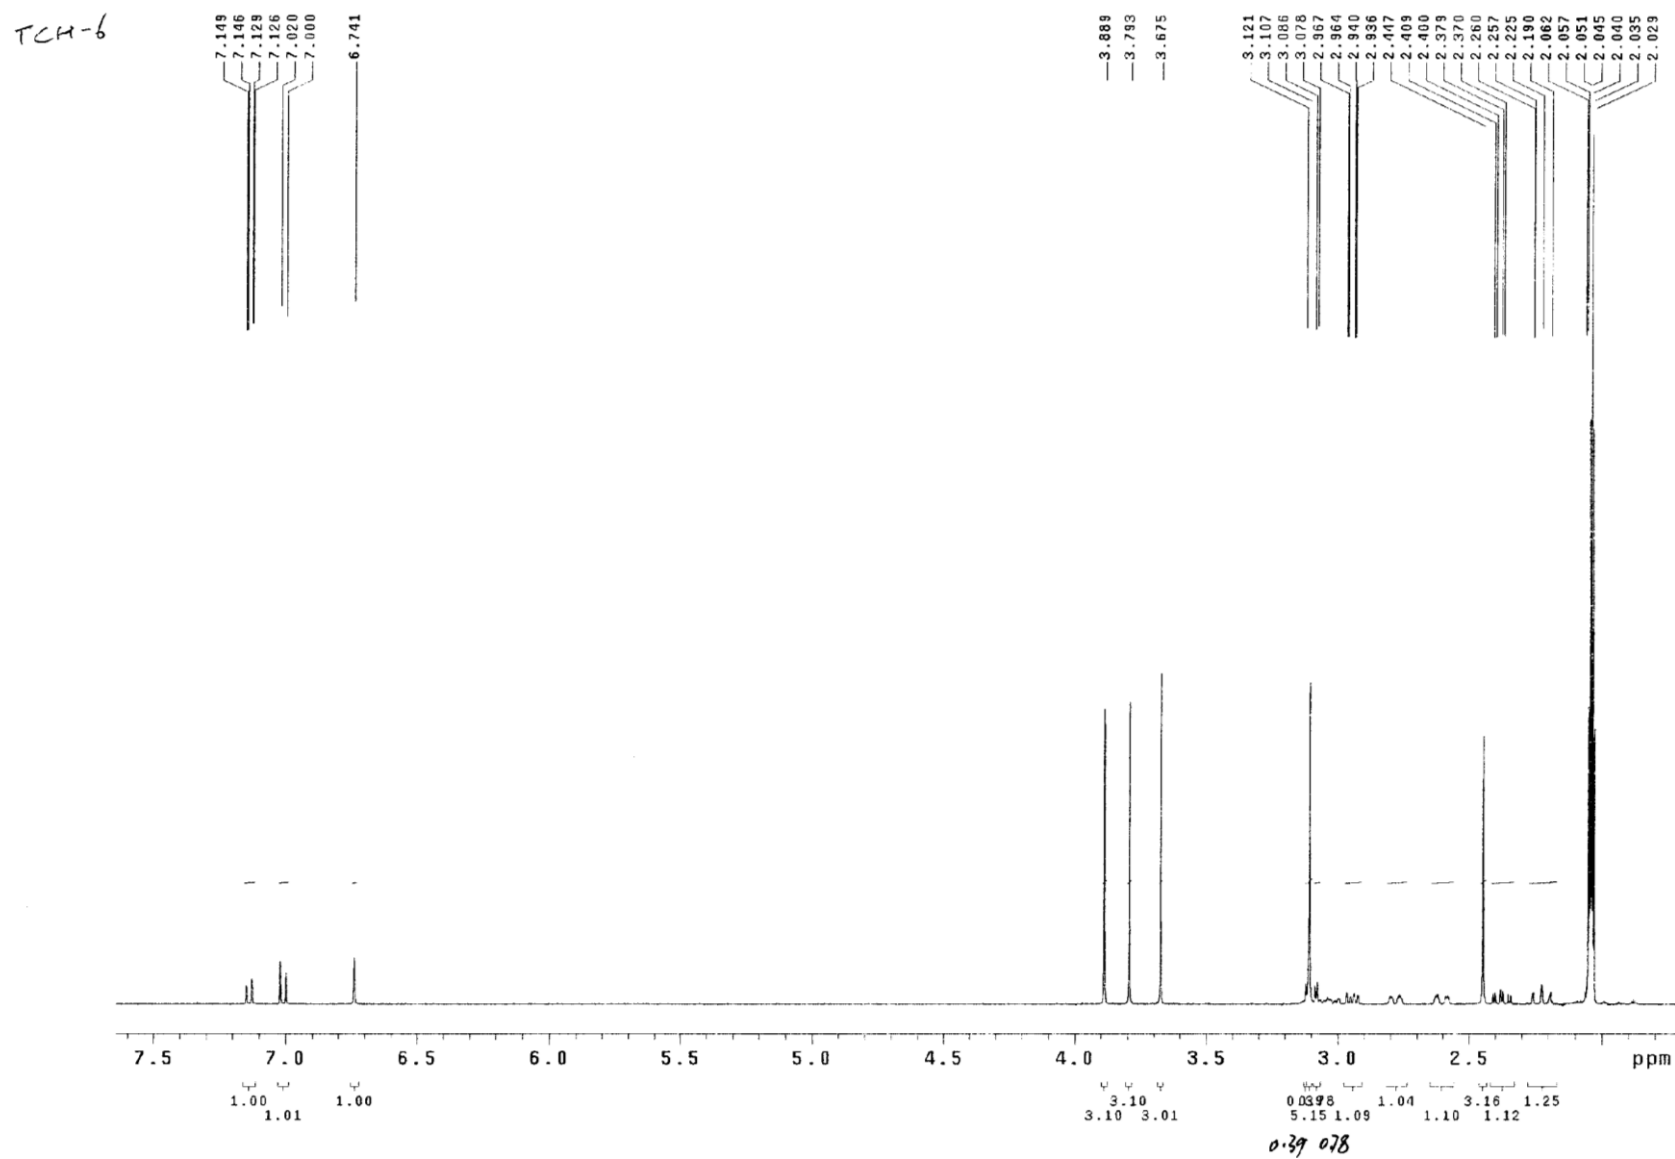

Figure S4.  $^{13}\text{C}$ -NMR (100 MHz,  $\text{CD}_3\text{COCD}_3$ ) spectra of isocorydine (1).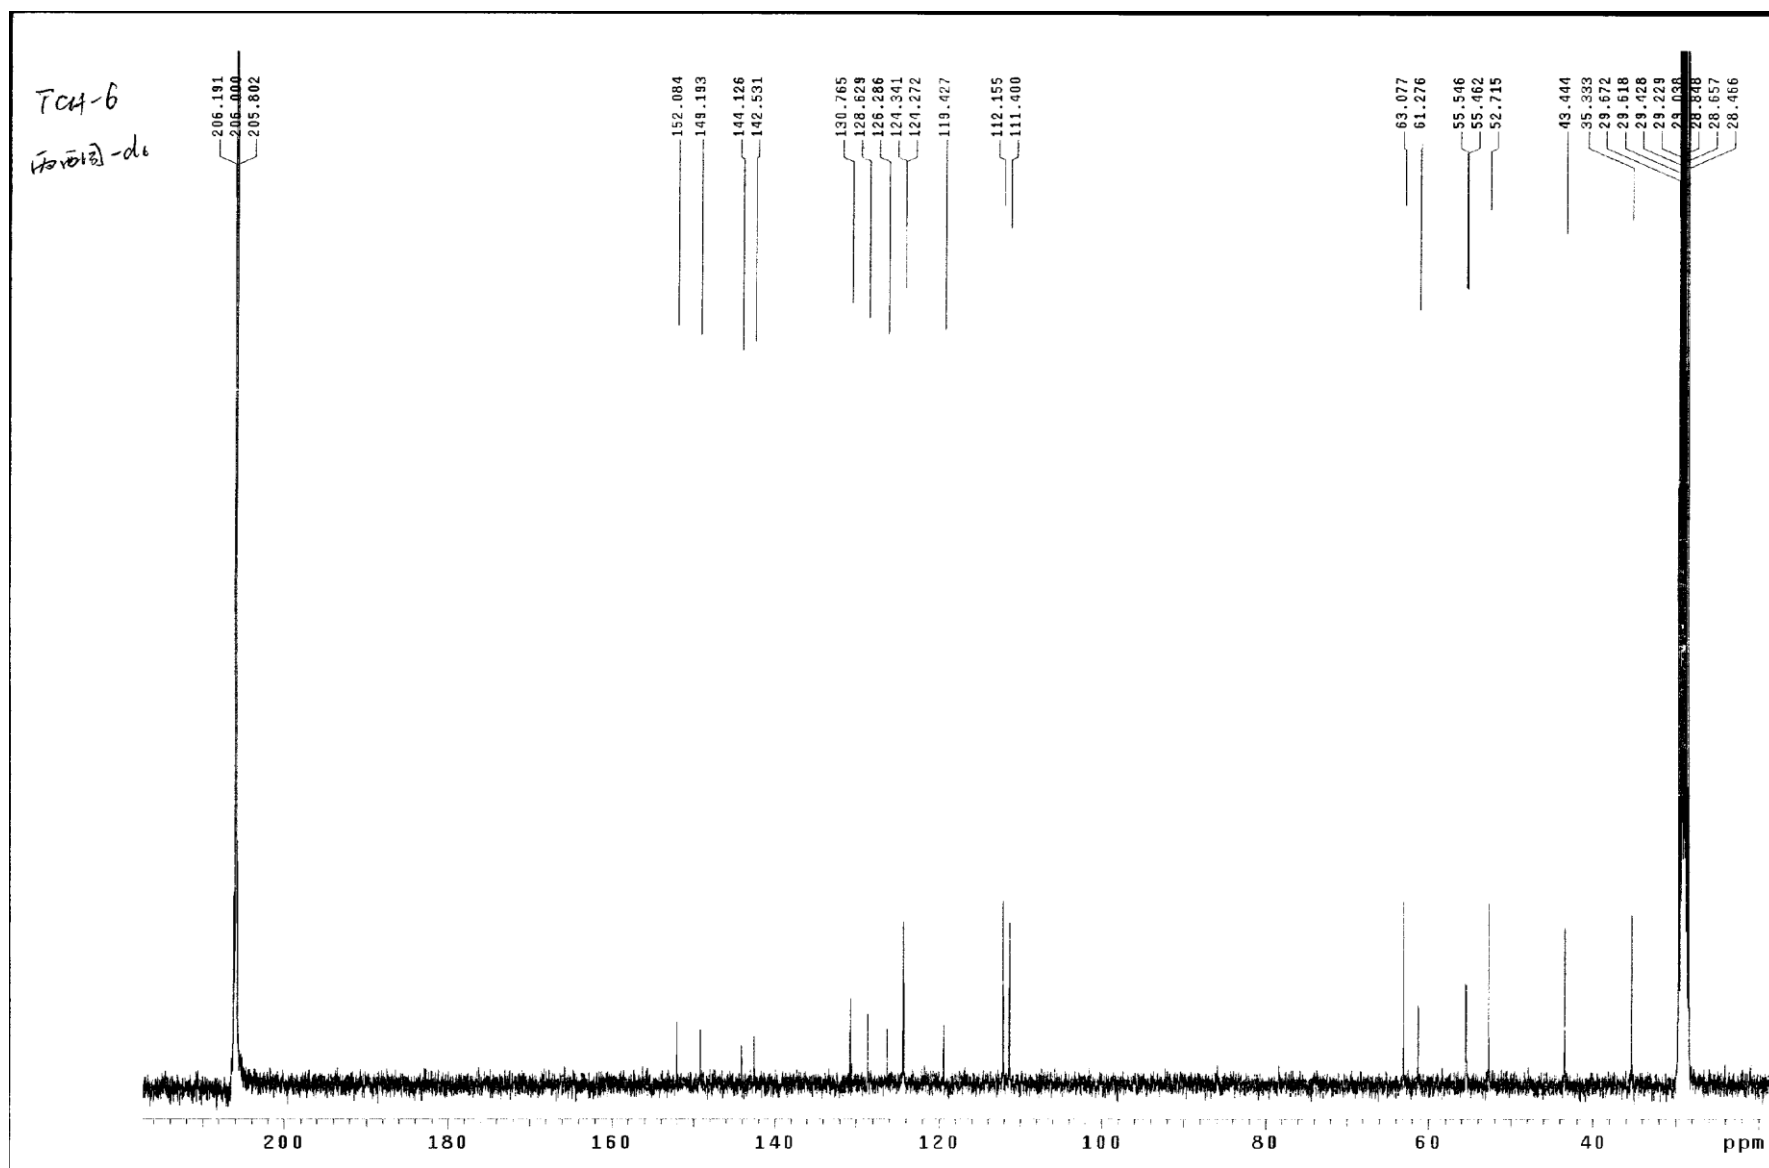

Figure S5. HRMS (ESI) spectra of isocorydine (1).

## Generic Display Report

## Analysis Info

Analysis Name D:\Data\user\zhongmei 14-07-07-2.d  
Method tune\_wide.m  
Sample Name 1  
Comment

Acquisition Date 7/7/2014 3:28:11 PM

Operator BDAL@CN  
Instrument micrOTOF-Q II

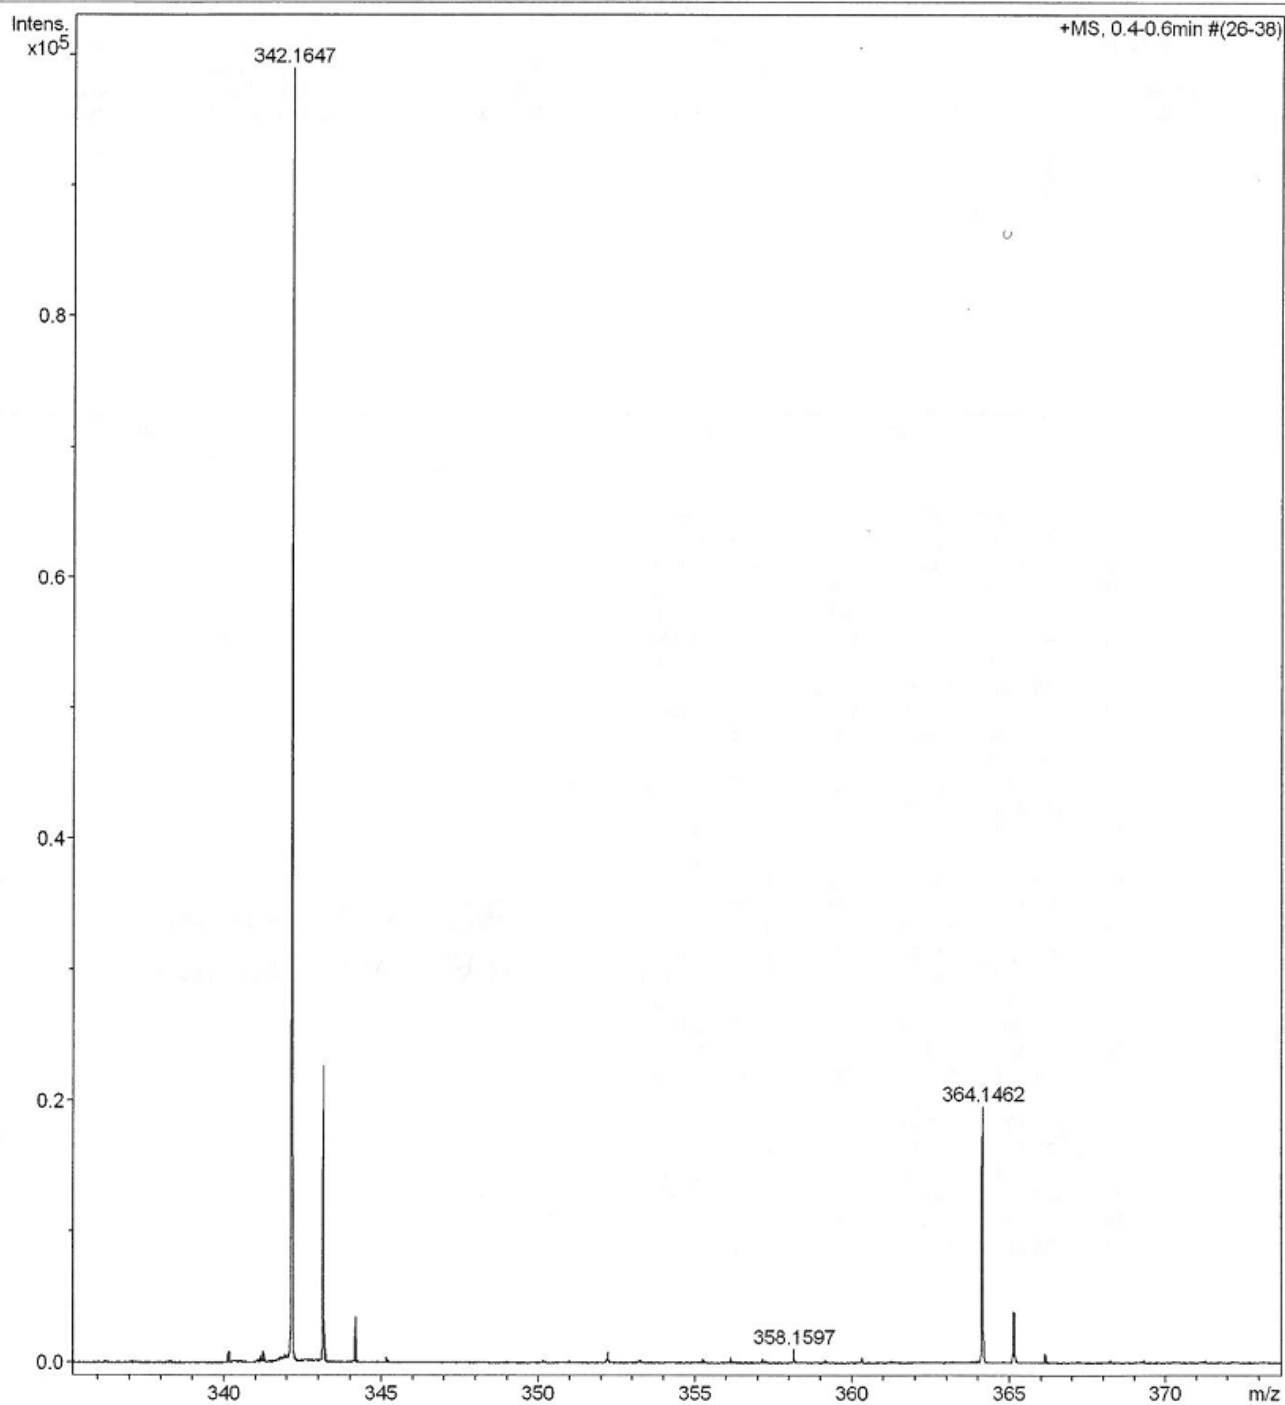

Figure S6.  $^1\text{H-NMR}$  (400 MHz,  $\text{CDCl}_3$ ) spectra of isocorydione (**2**).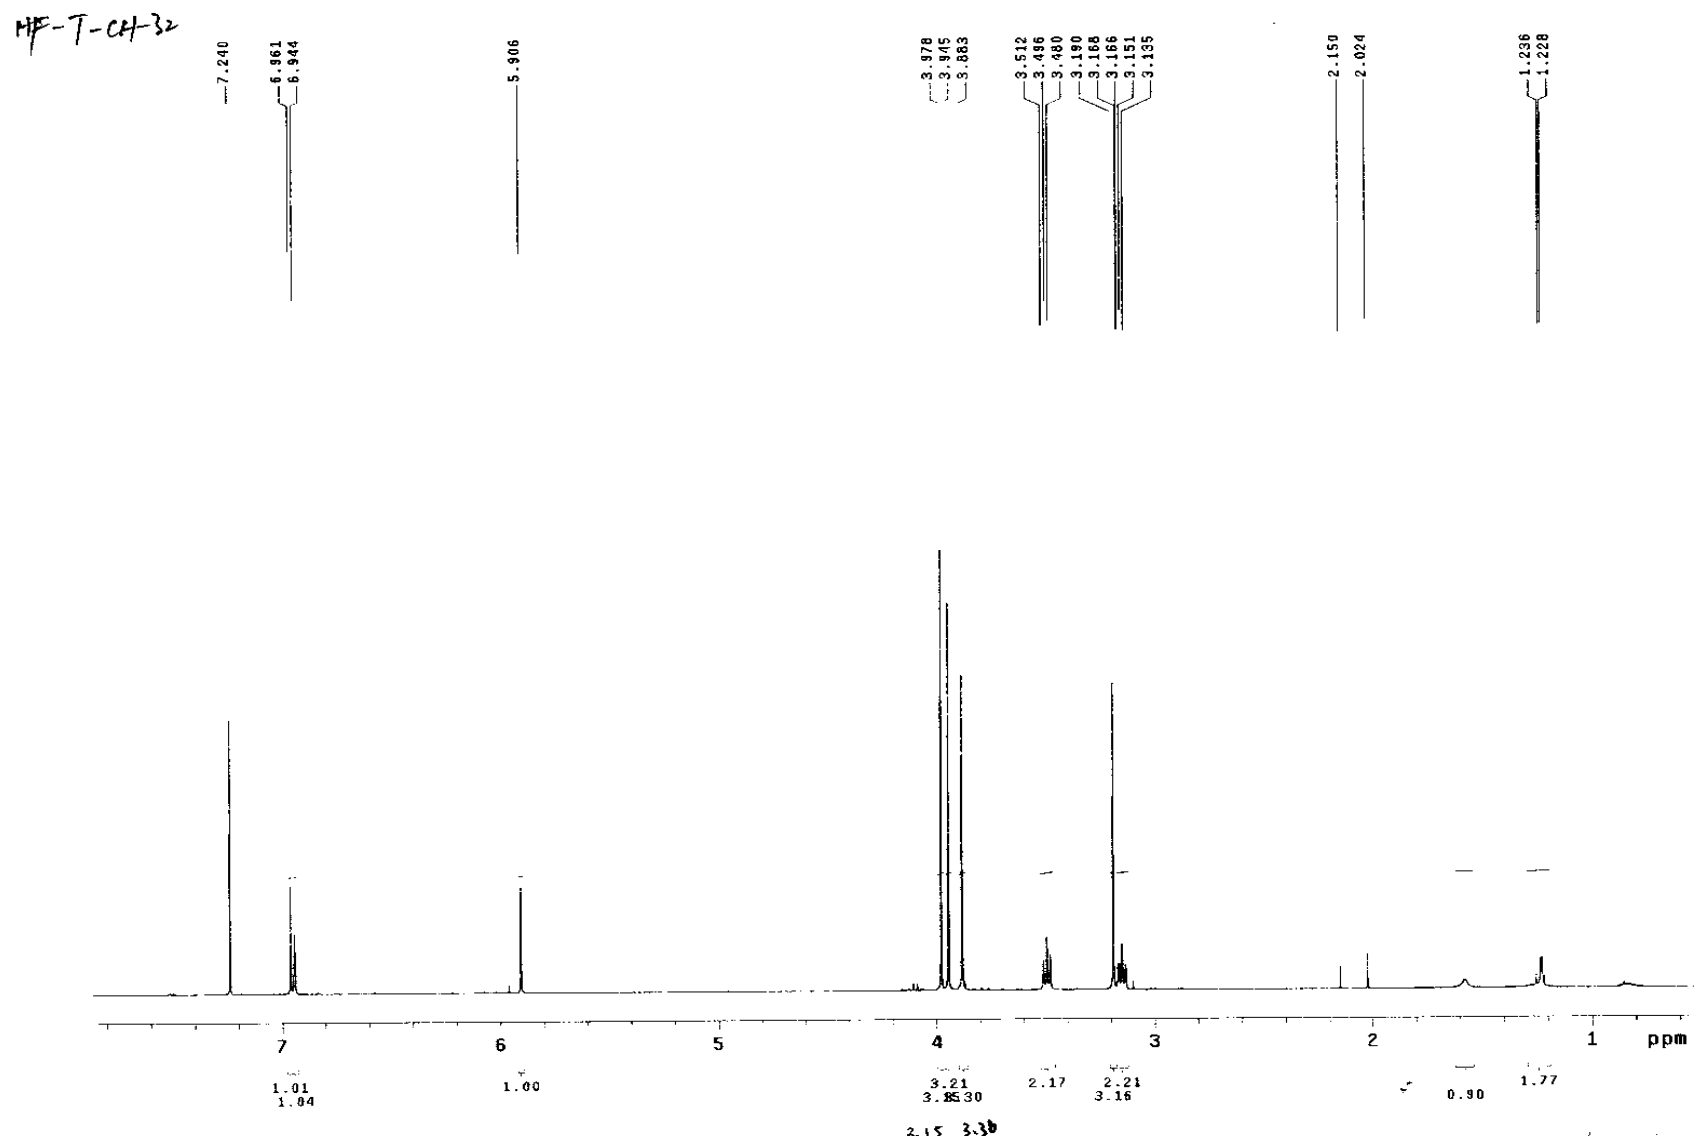

Figure S7.  $^{13}\text{C}$ -NMR (100 MHz,  $\text{CDCl}_3$ ) spectra of isocorydione (2).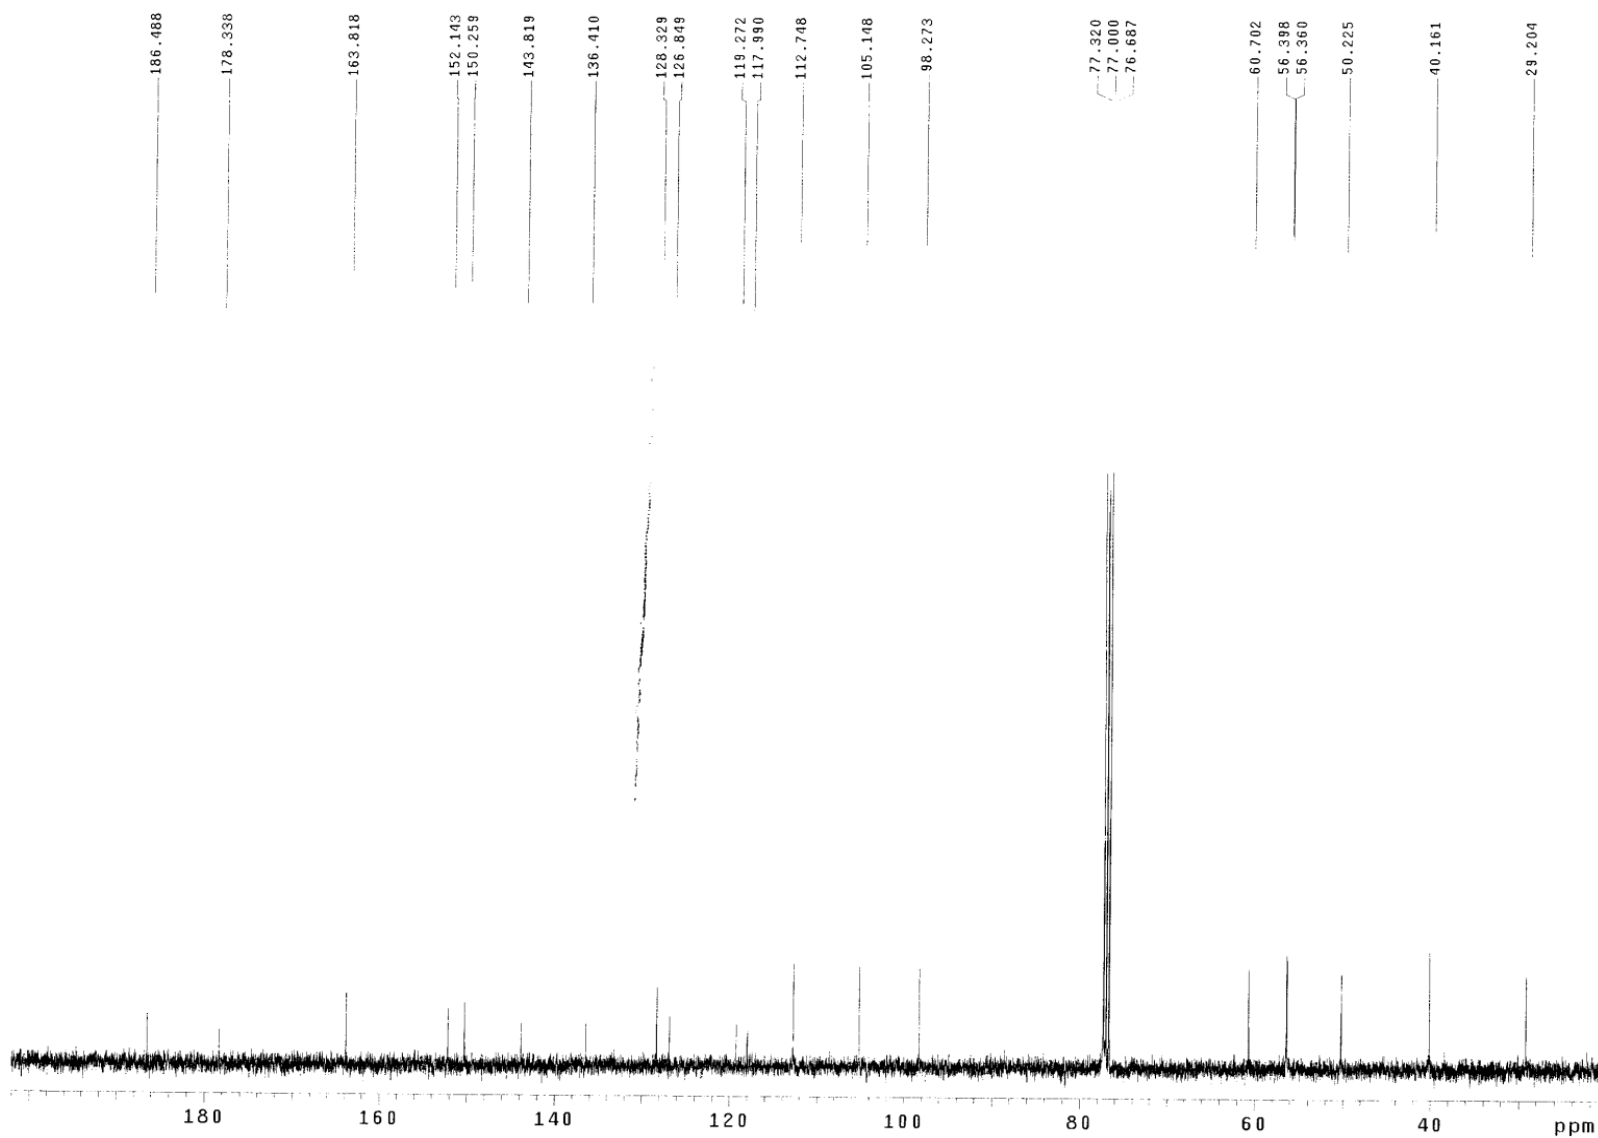

Figure S8. HRMS (ESI) spectra of isocorydione (2).

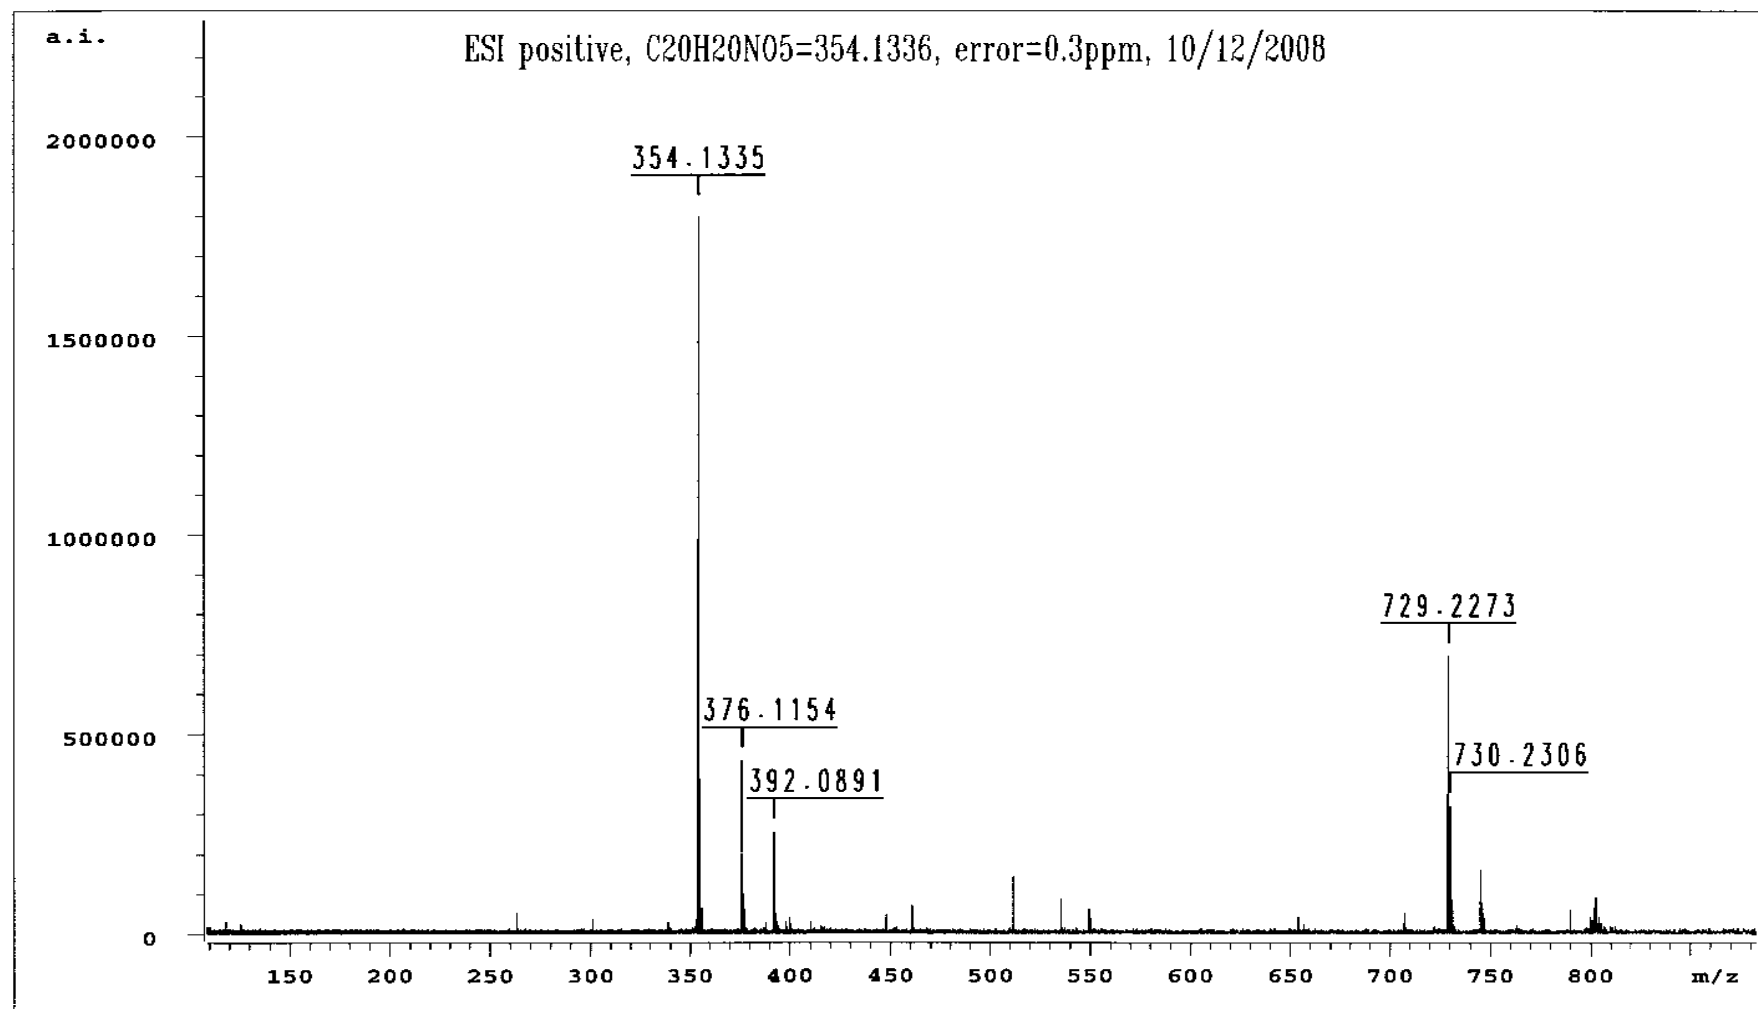

/u/data/TRAINING/gonghongfeil210/1/pdata/1 xspec Wed Dec 10 10:15:35 2008

**Figure S9.**  $^1\text{H-NMR}$  (400 MHz,  $\text{CDCl}_3$ ) spectra of 4-hydroxy-isocorydione (**3**).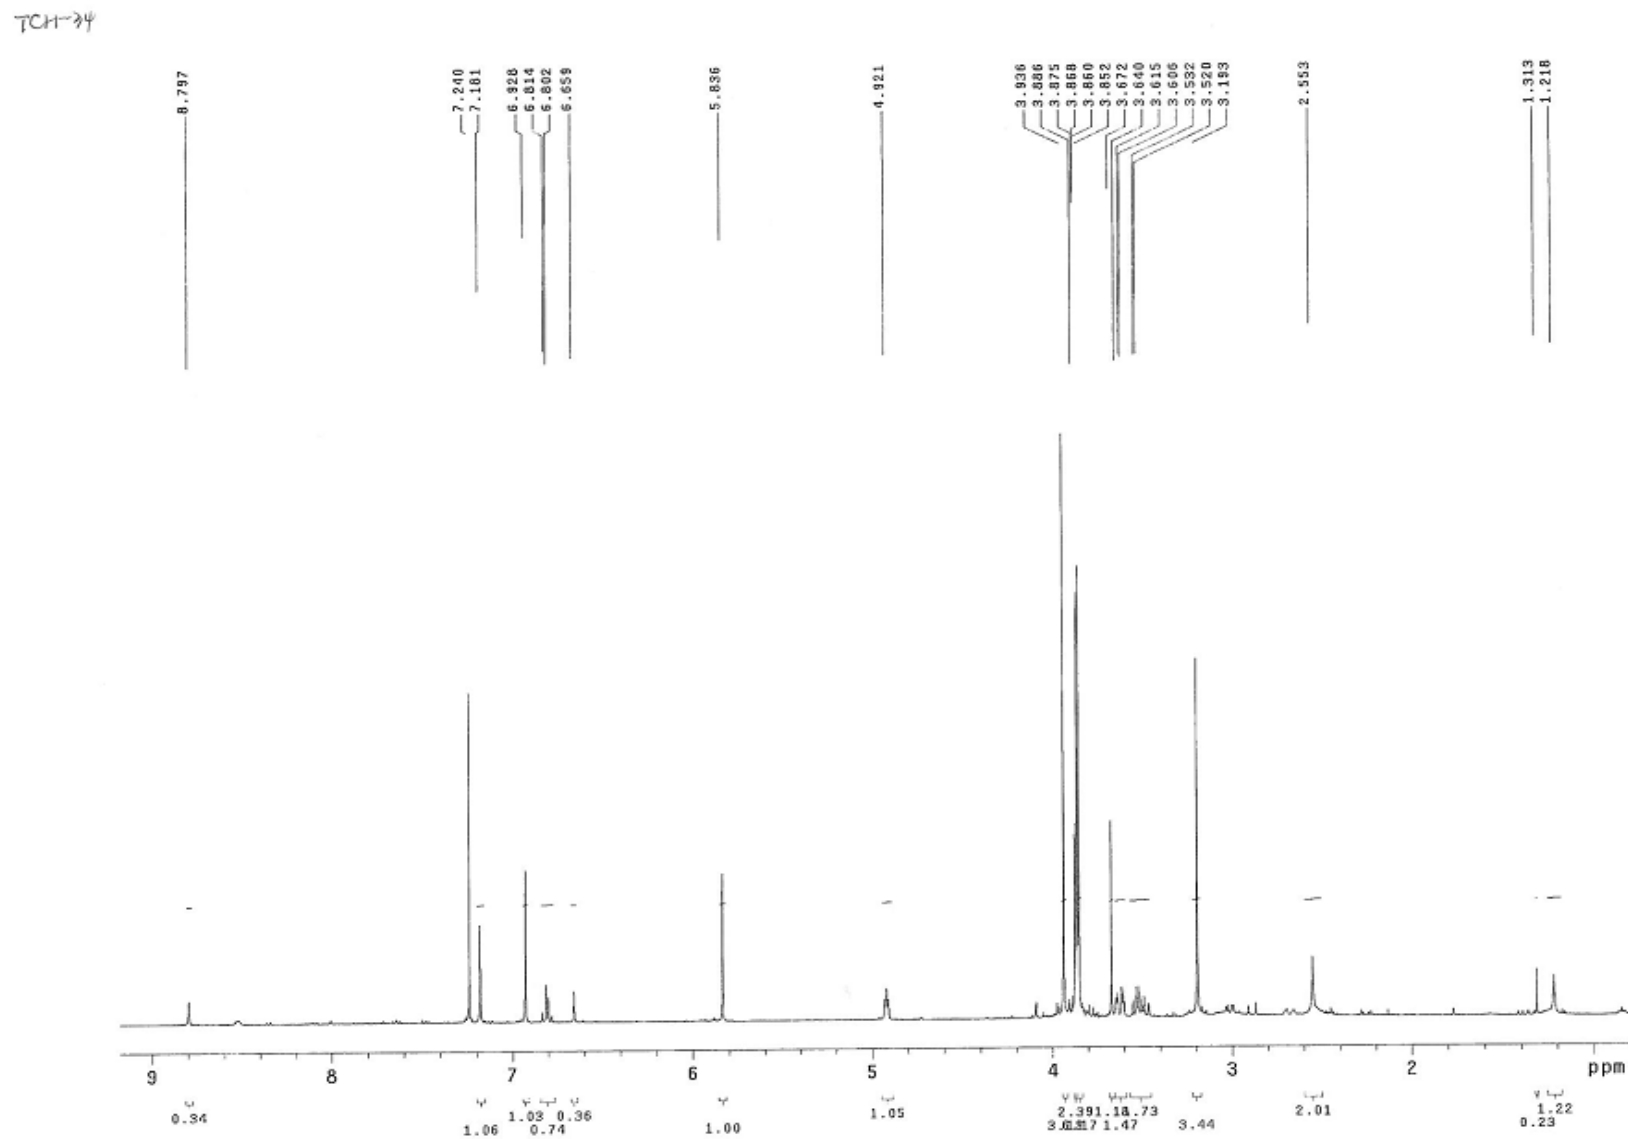



**Figure S10.**  $^{13}\text{C}$ -NMR (100 MHz,  $\text{CDCl}_3$ ) spectra of 4-hydroxy-isocorydione (**3**).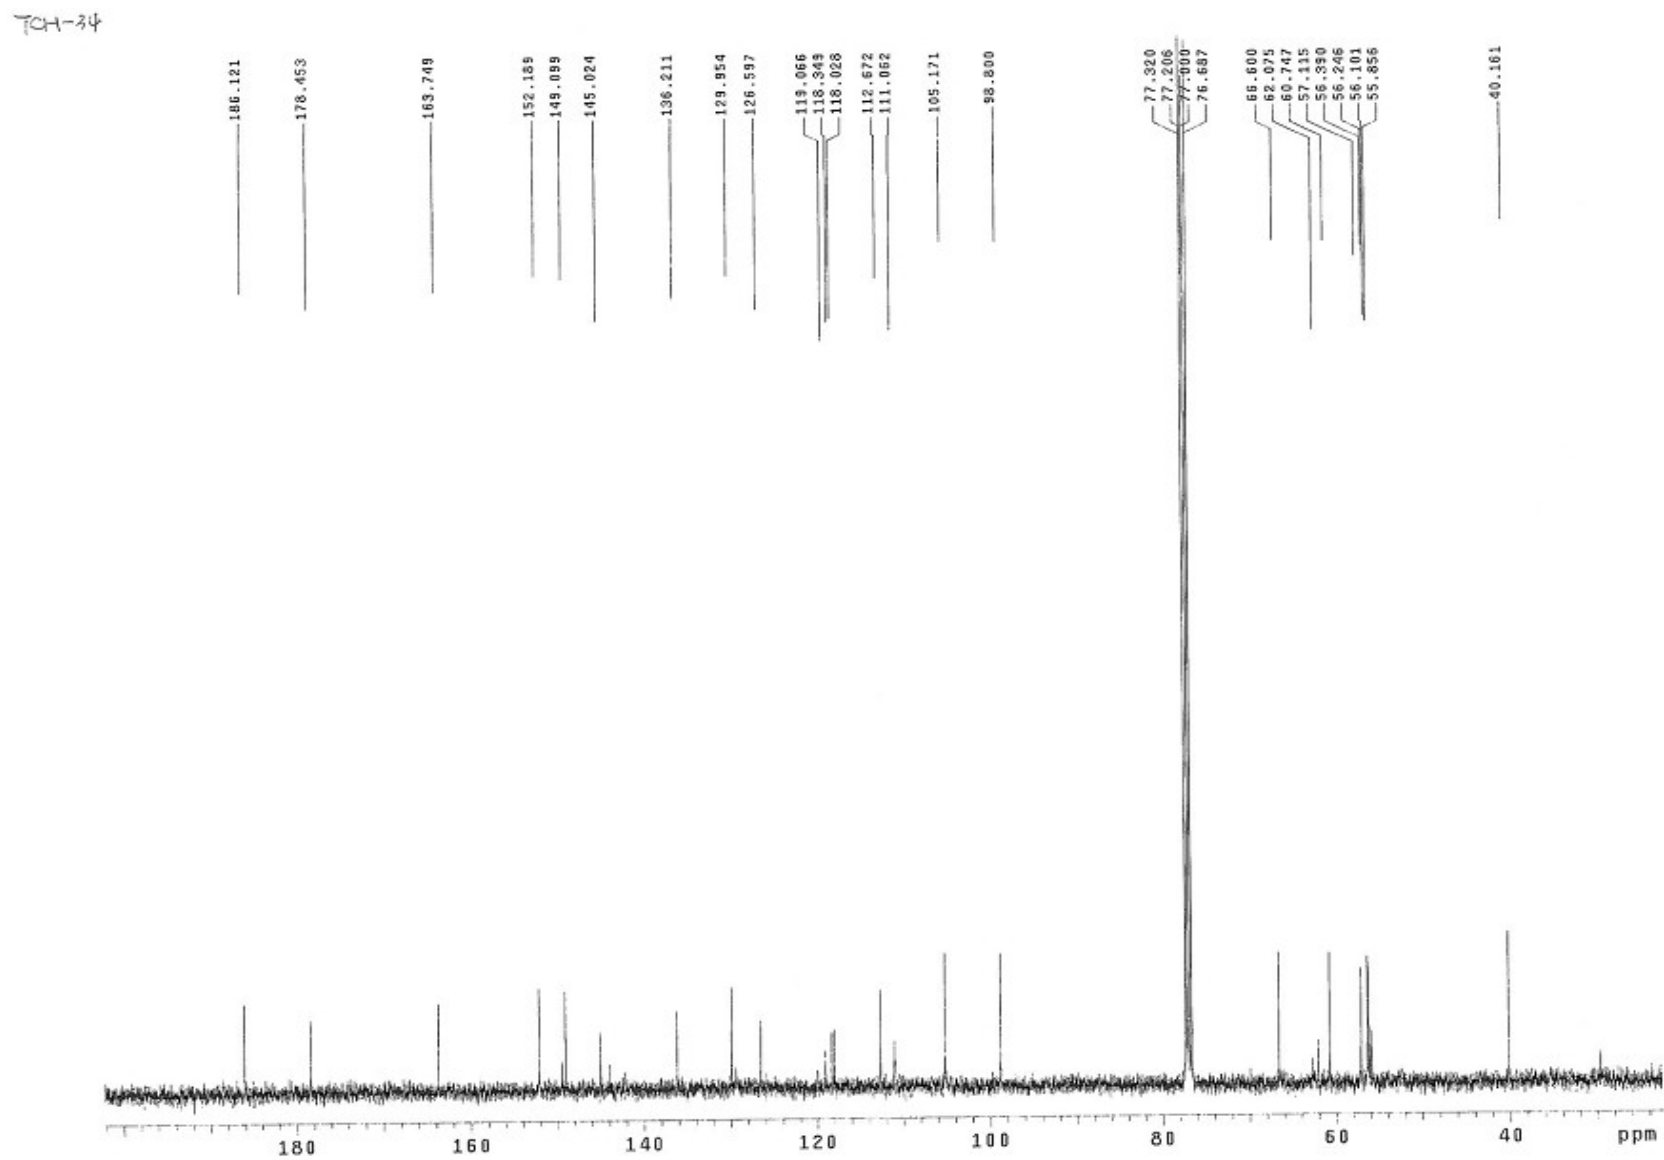

**Figure S11.** HRMS (ESI) spectra of 4-hydroxy-isocorydione (**3**).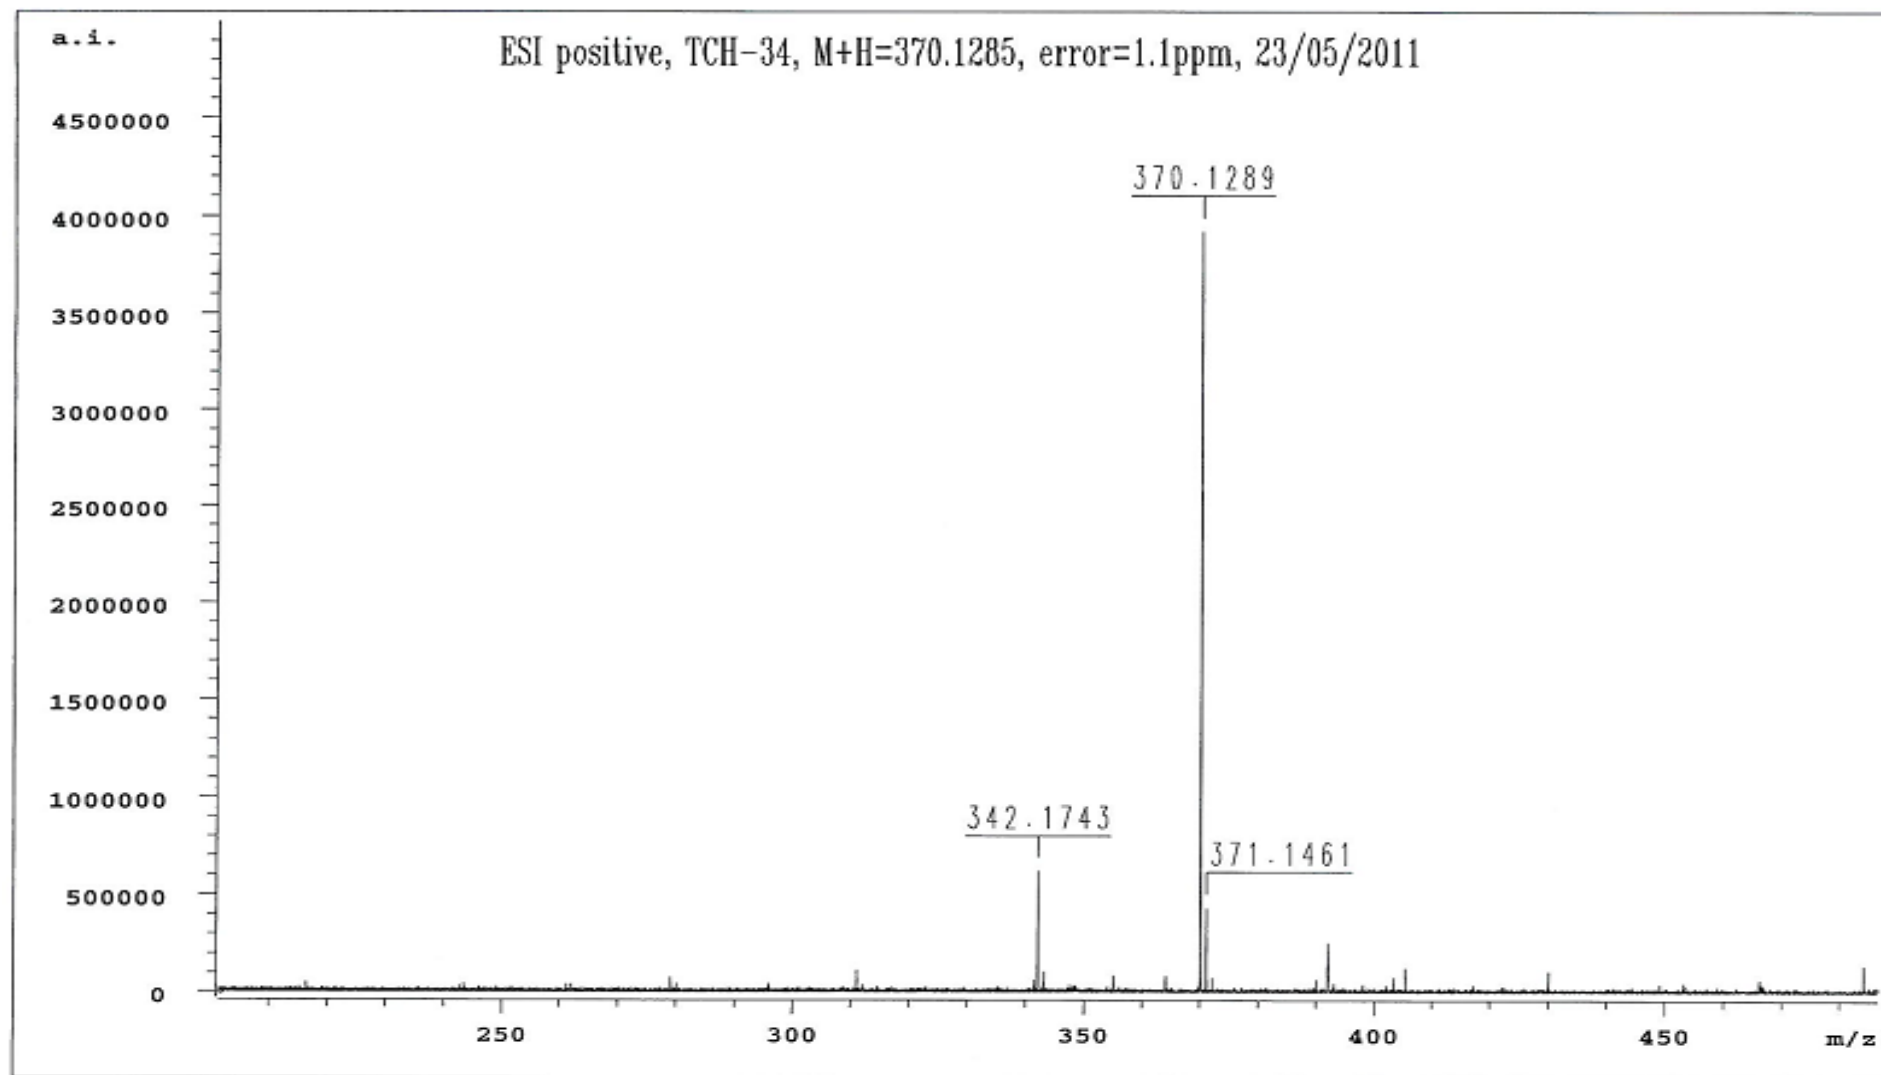

/u/data/TRAINING/zhangtiancai0523/2/pdata/1 xspec Mon May 23 17:22:52 2011

**Figure S12.**  $^1\text{H-NMR}$  (400 MHz,  $\text{CDCl}_3$ ) spectra of N-demethyl-isocorydione (**4**).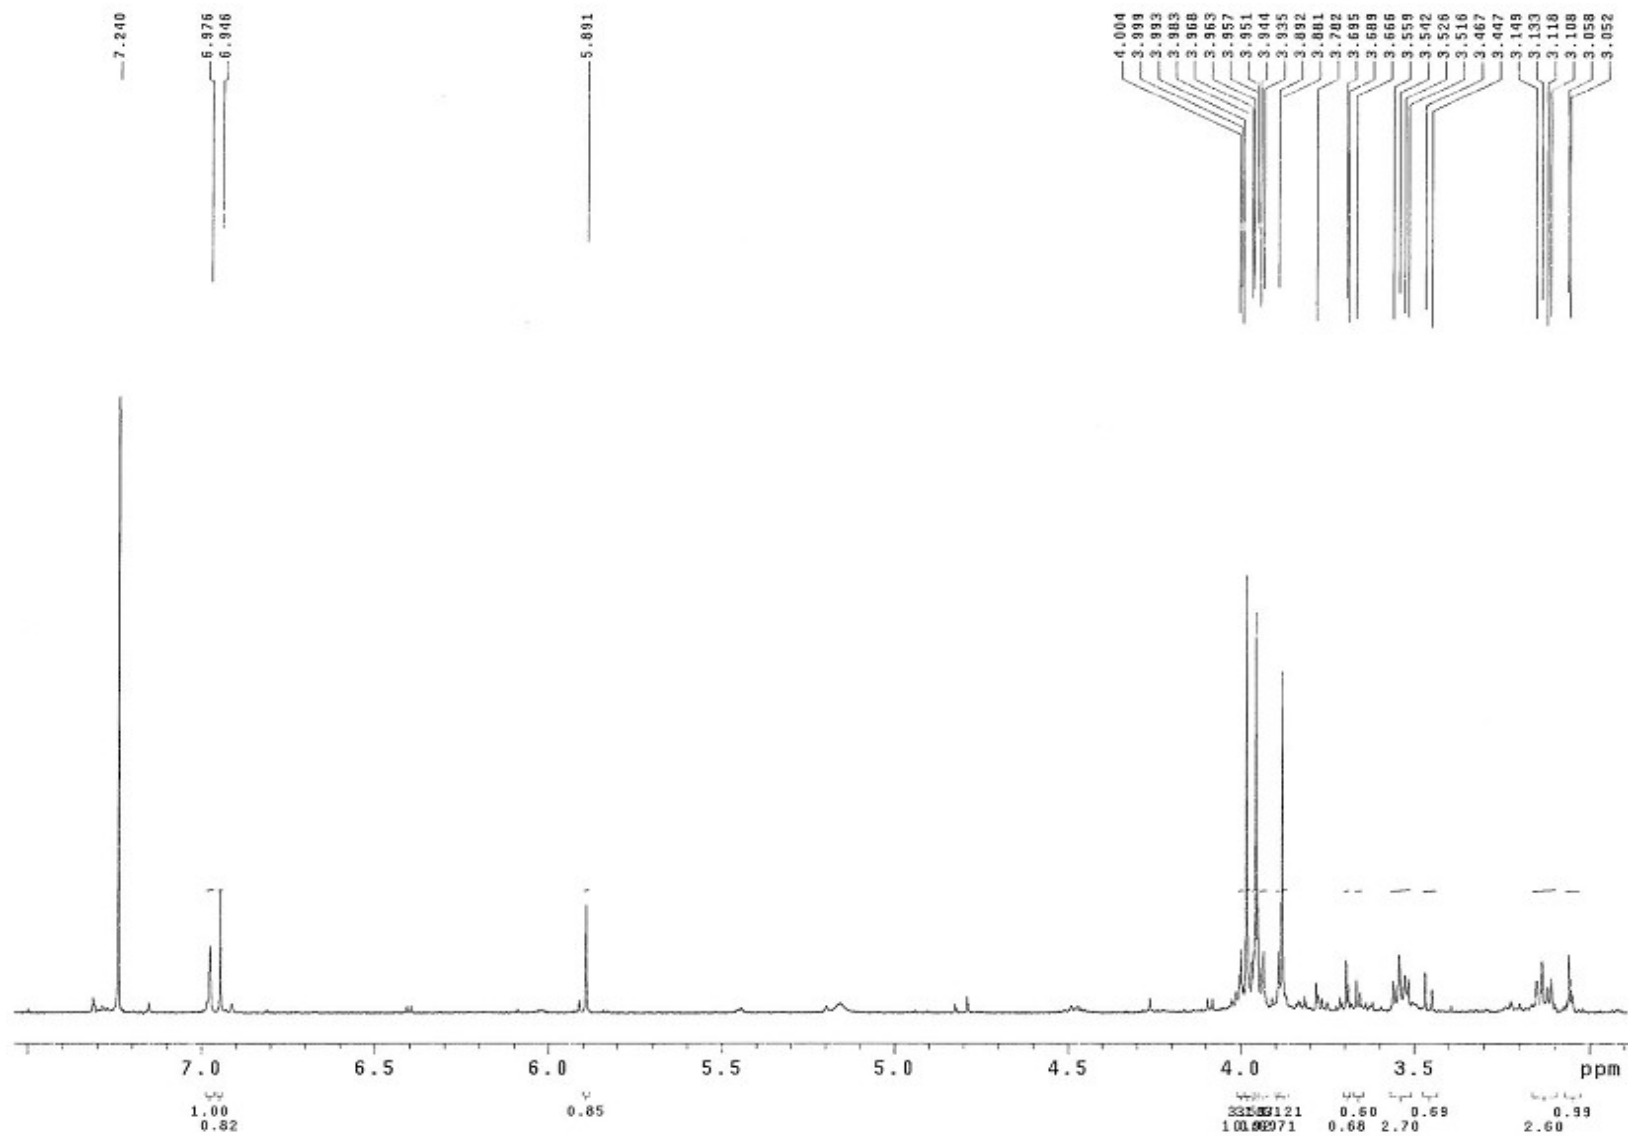

**Figure S13.**  $^1\text{H-NMR}$  (400 MHz,  $\text{CDCl}_3$ ) spectra of N-demethyl-isocorydione (4).

TCH-E

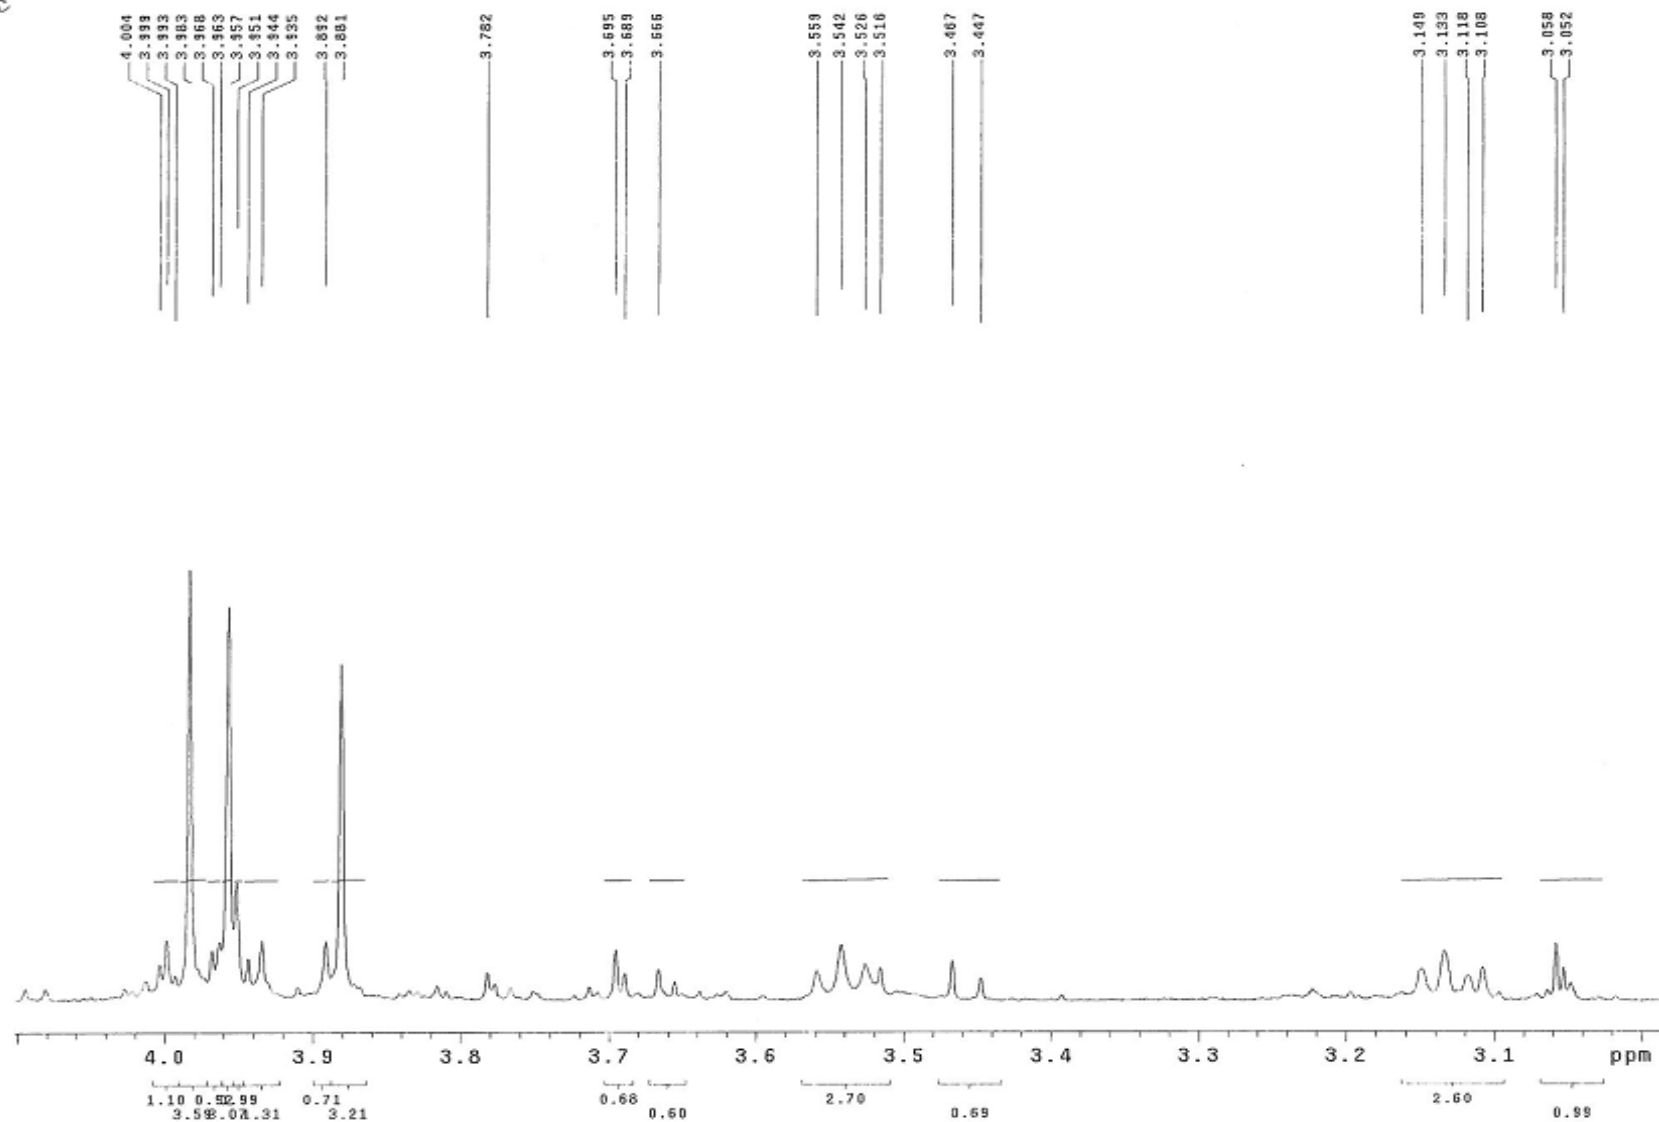

**Figure S14.**  $^{13}\text{C}$ -NMR (100 MHz,  $\text{CDCl}_3$ ) spectra of N-demethyl-isocorydione (**4**).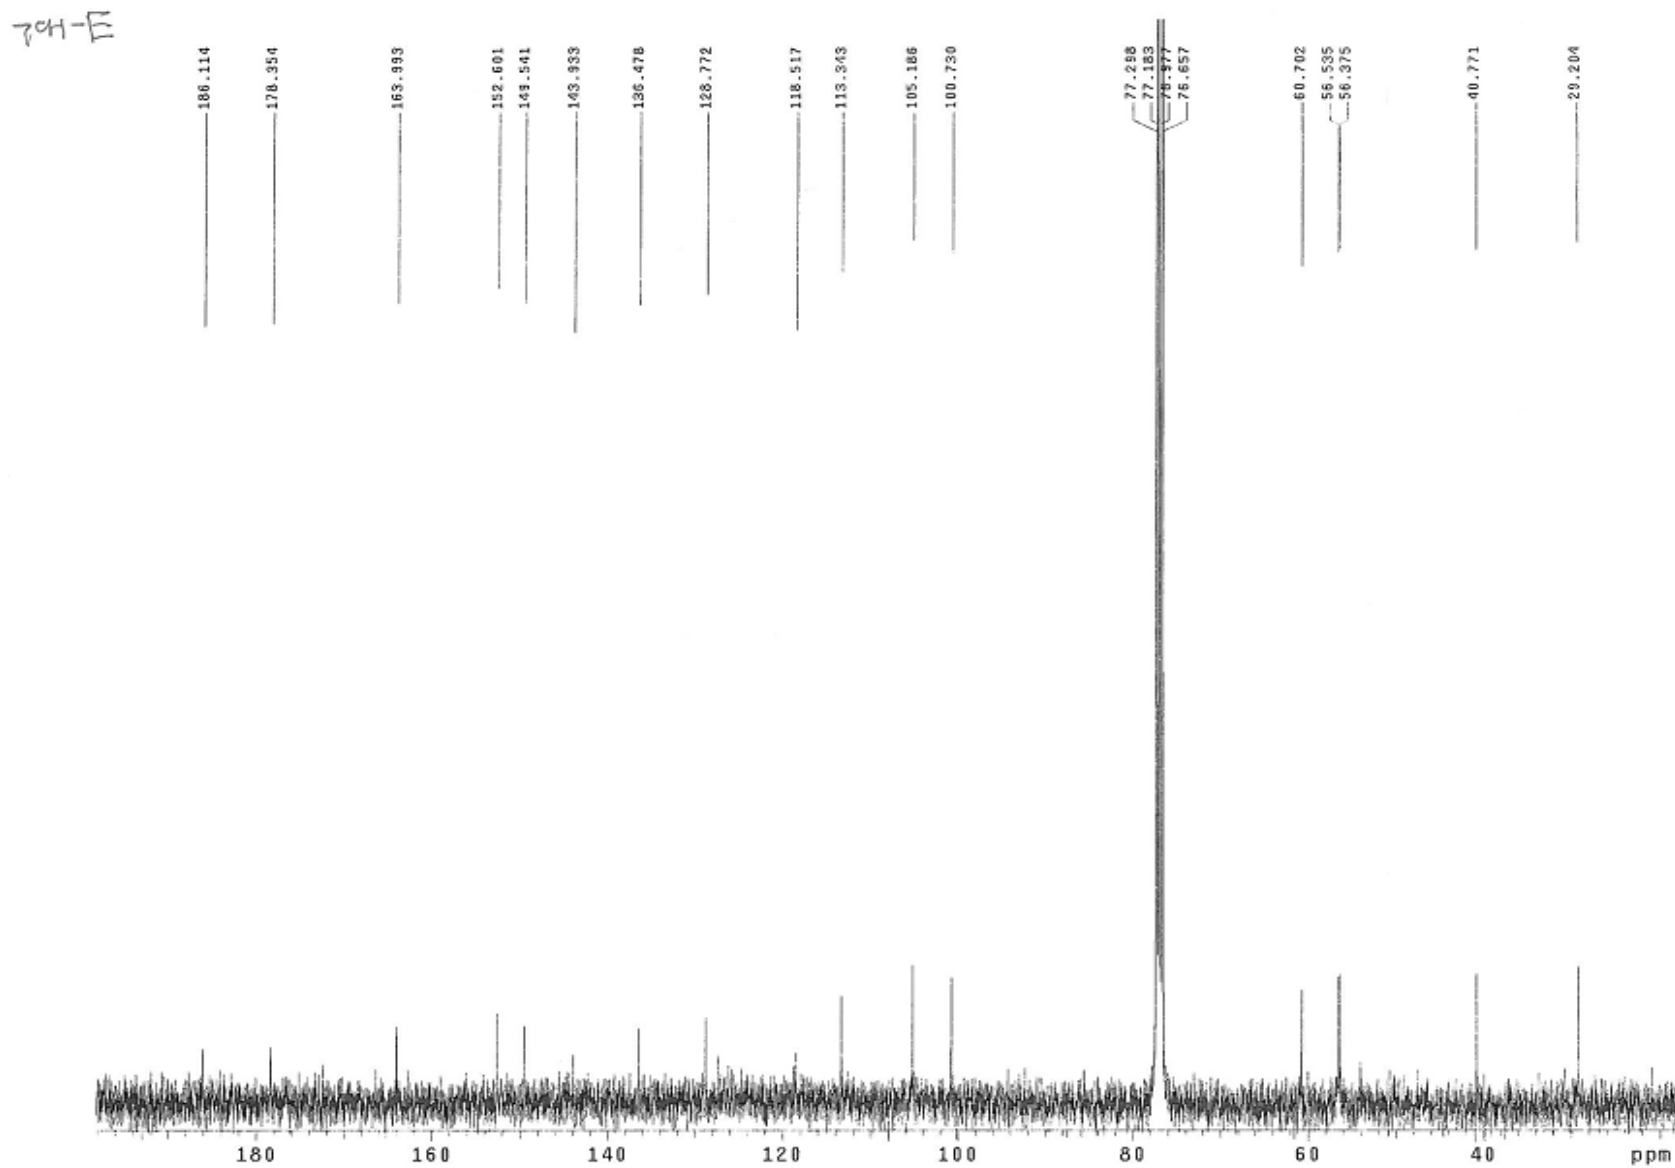

**Figure S15.** HRMS (ESI) spectra of N-demethyl-isocorydione (4).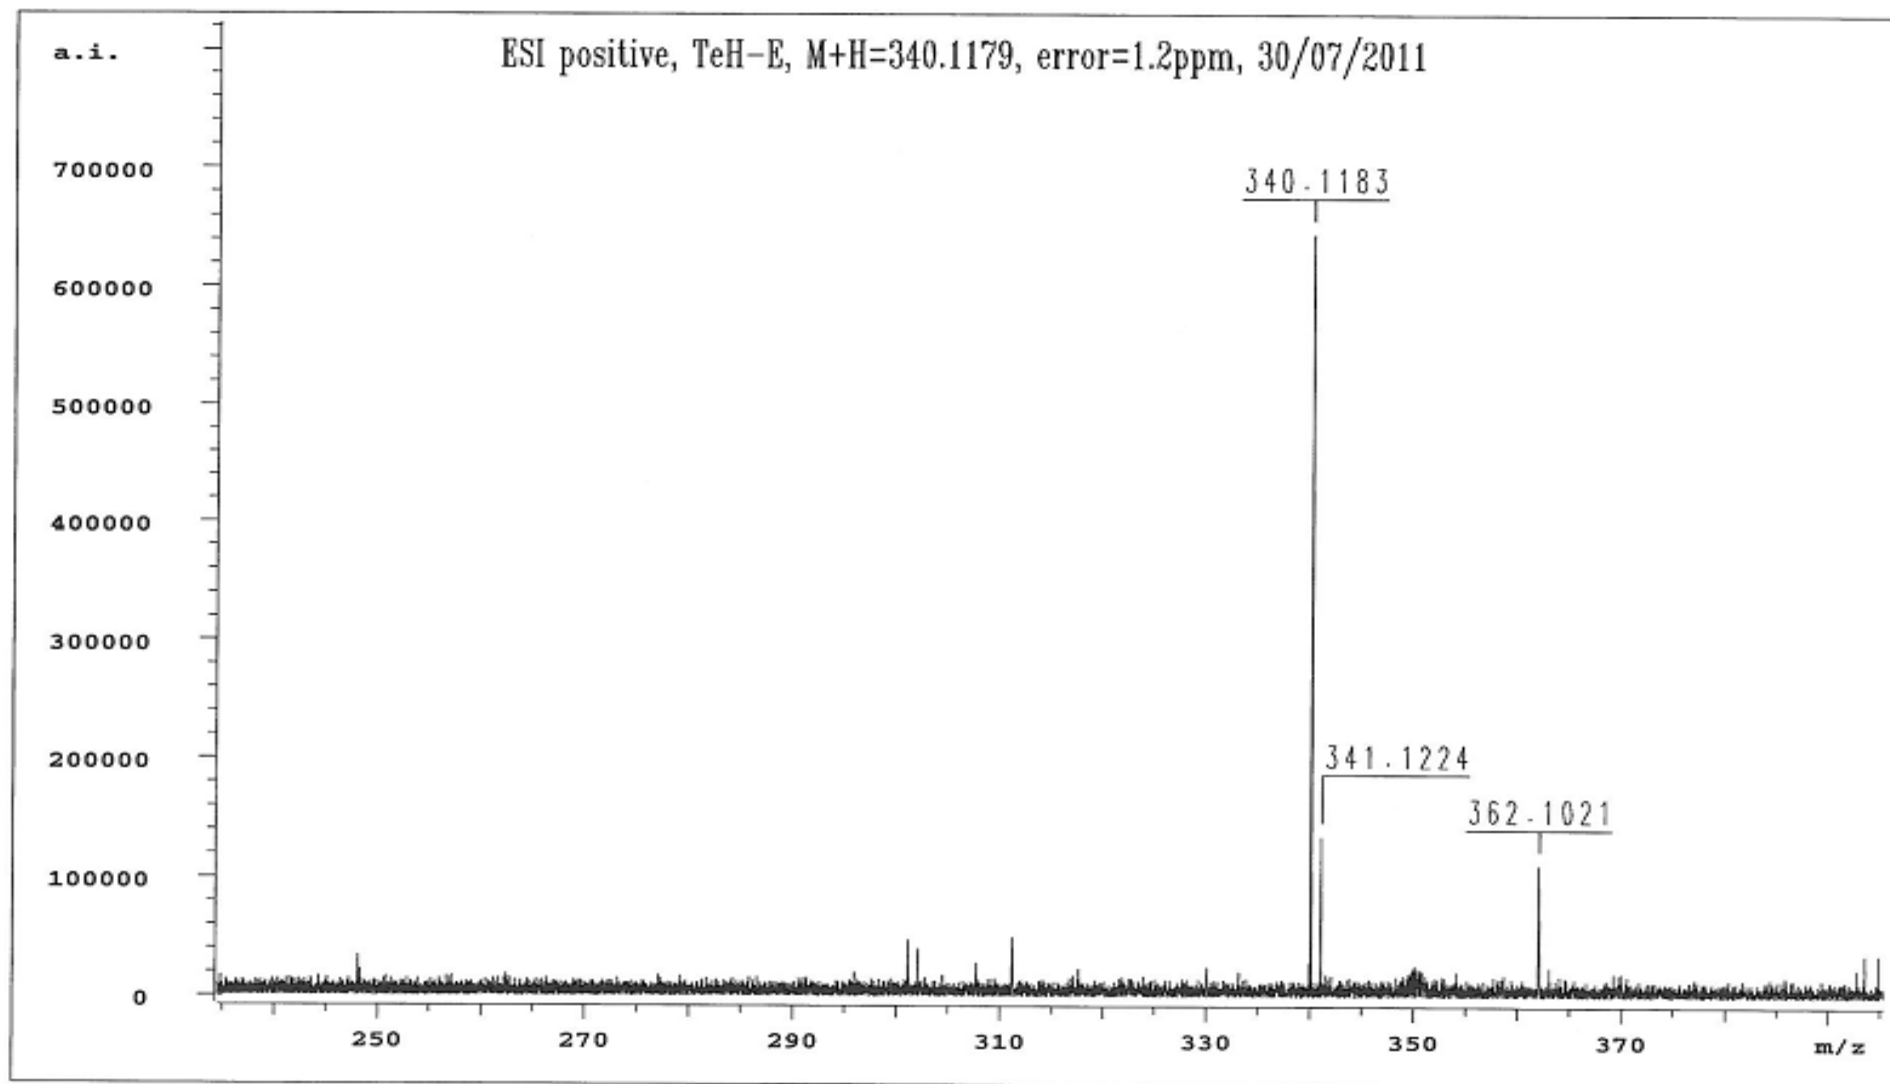

/u/data/TRAINING/hus0630/1/pdata/1 xspec Thu Jun 30 15:14:13 2011

**Figure S16.**  $^1\text{H-NMR}$  (400 MHz,  $\text{CDCl}_3$ ) spectra of 7-hydroxy-N-demethyl-isocorydione (**5**).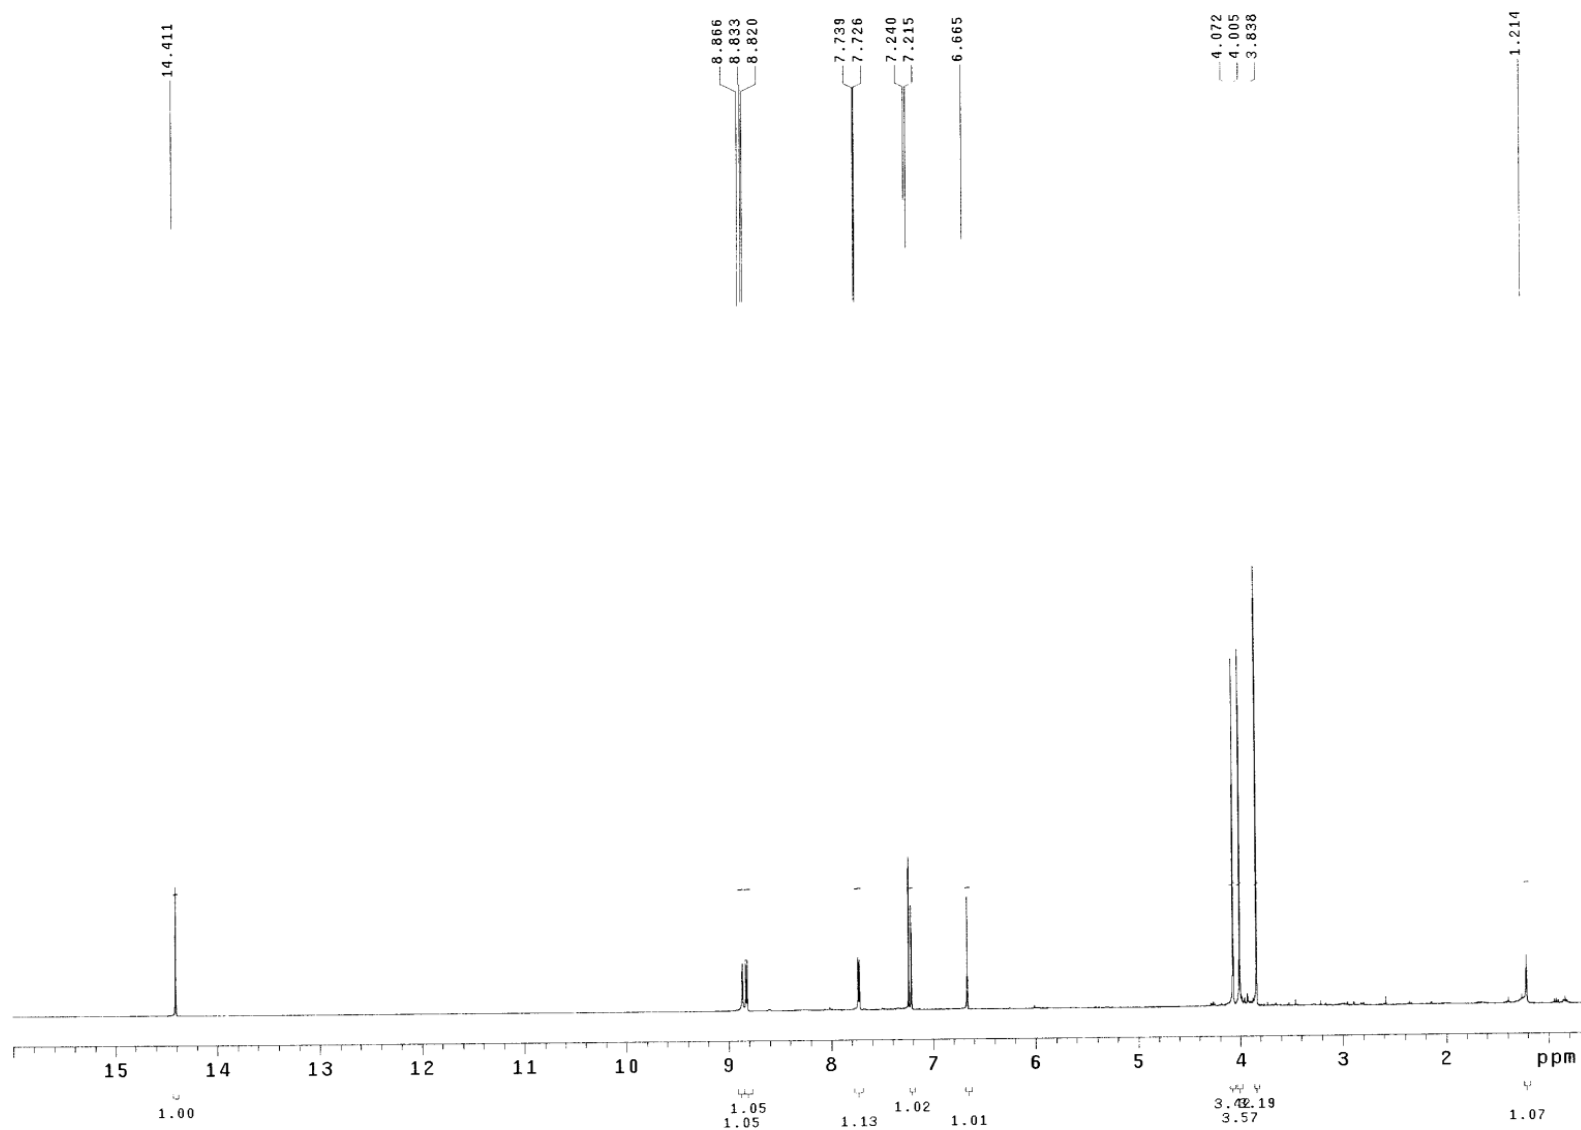

**Figure S17.**  $^{13}\text{C}$ -NMR (100 MHz,  $\text{CDCl}_3$ ) spectra of 7-hydroxy-N-demethyl-isocorydione (**5**).

T24-35

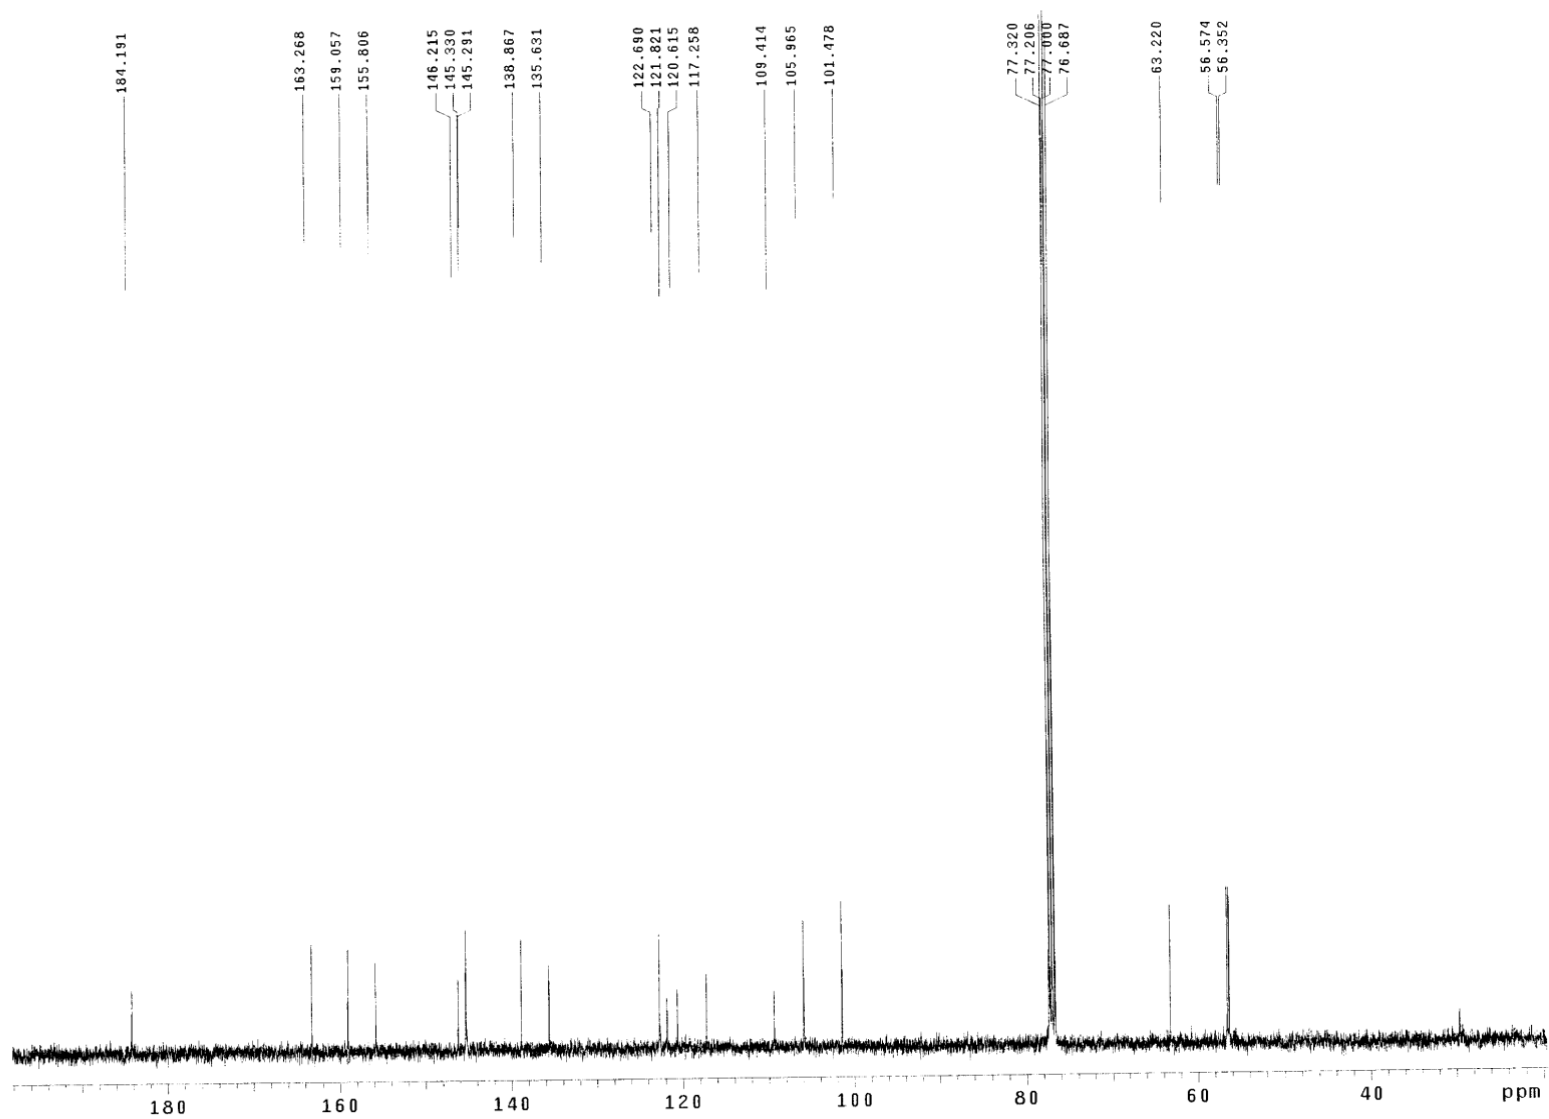



**Figure S18.** HRMS (ESI) spectra of 7-hydroxy-N-demethyl-isocorydione (**5**).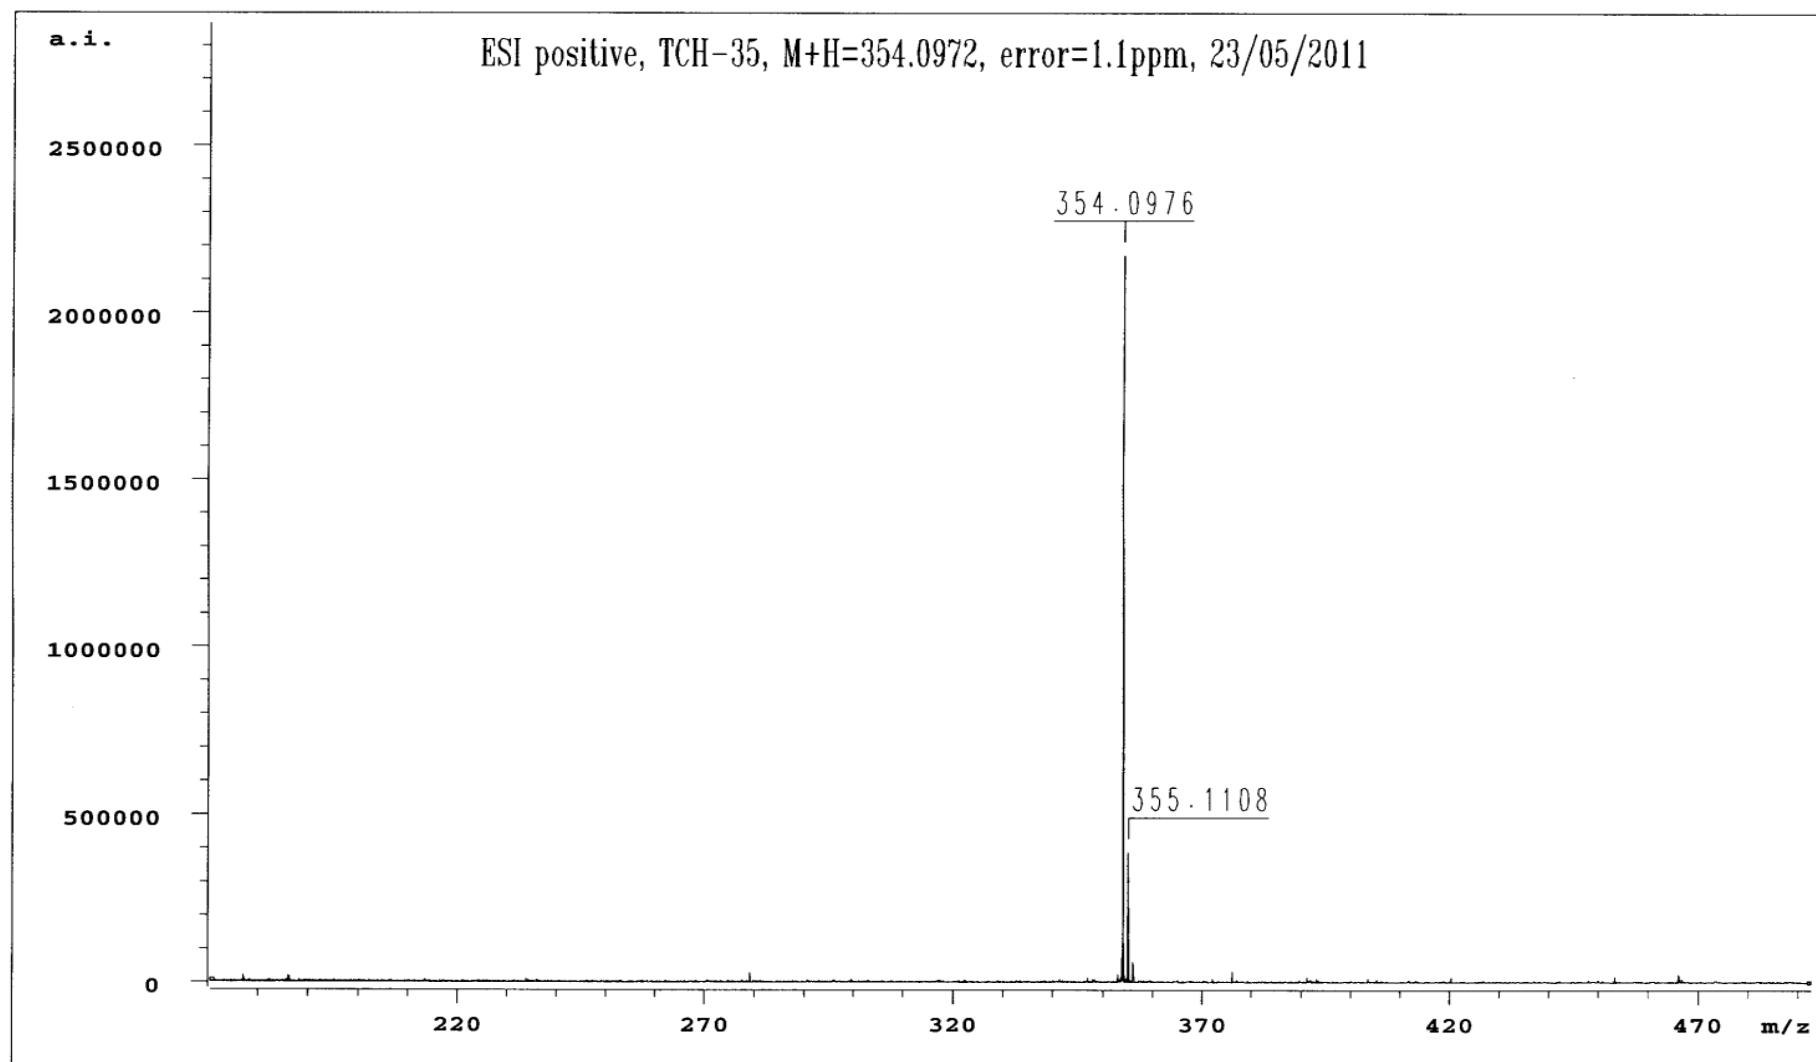

**Figure S19.**  $^1\text{H-NMR}$  (400 MHz,  $\text{CDCl}_3$ ) spectra of 8-nitro-isocorydine (7).

Iso-1

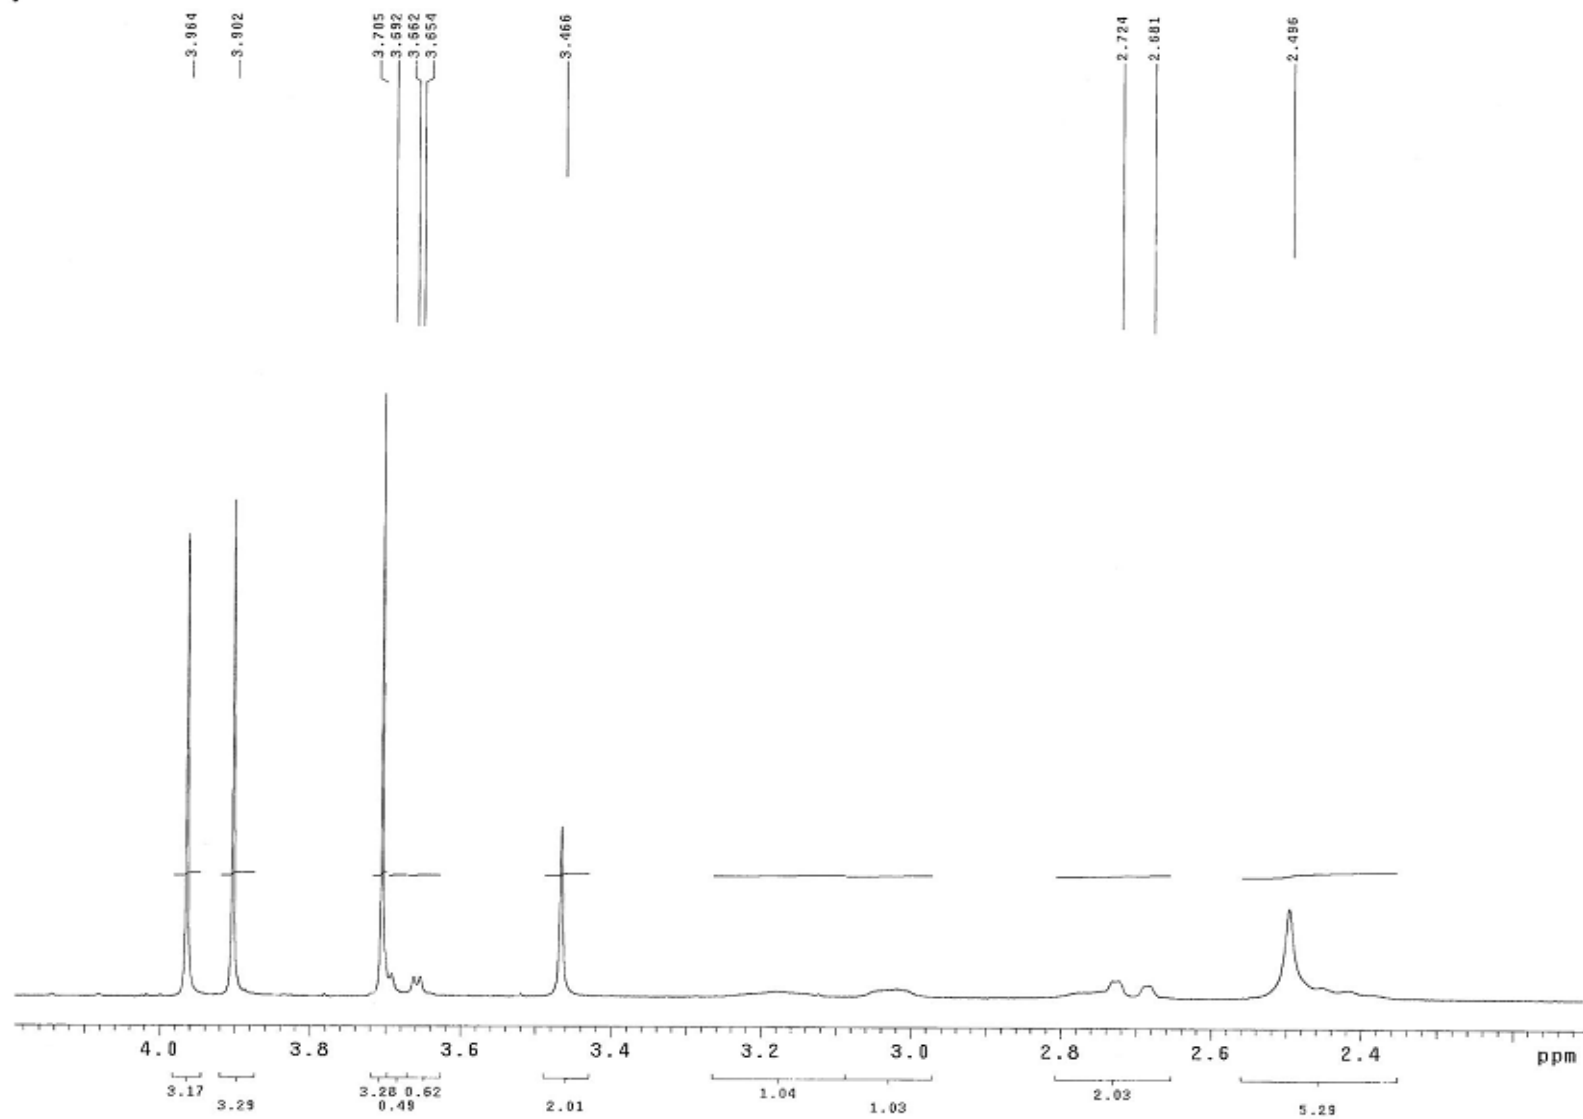

**Figure S20.**  $^1\text{H-NMR}$  (400 MHz,  $\text{CDCl}_3$ ) spectra of 8-nitro-isocorydine (7).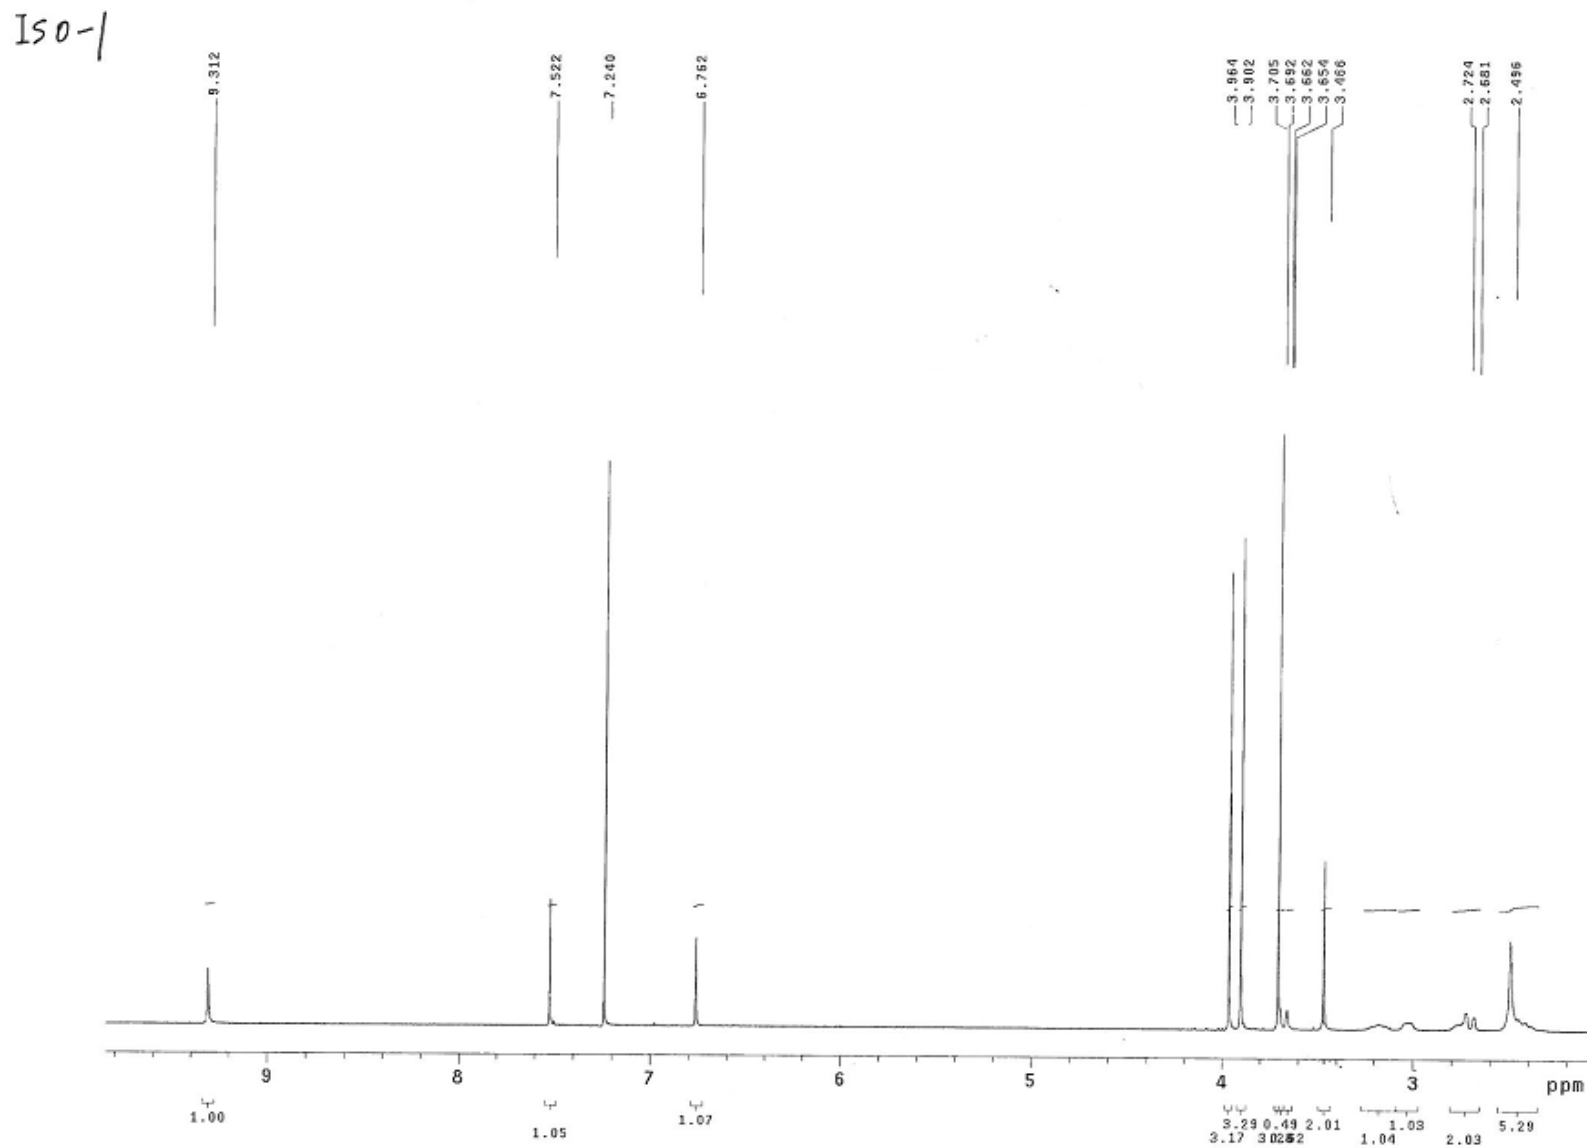

**Figure S21.**  $^{13}\text{C}$ -NMR (100 MHz,  $\text{CDCl}_3$ ) spectra of 8-nitro-isocorydine (7).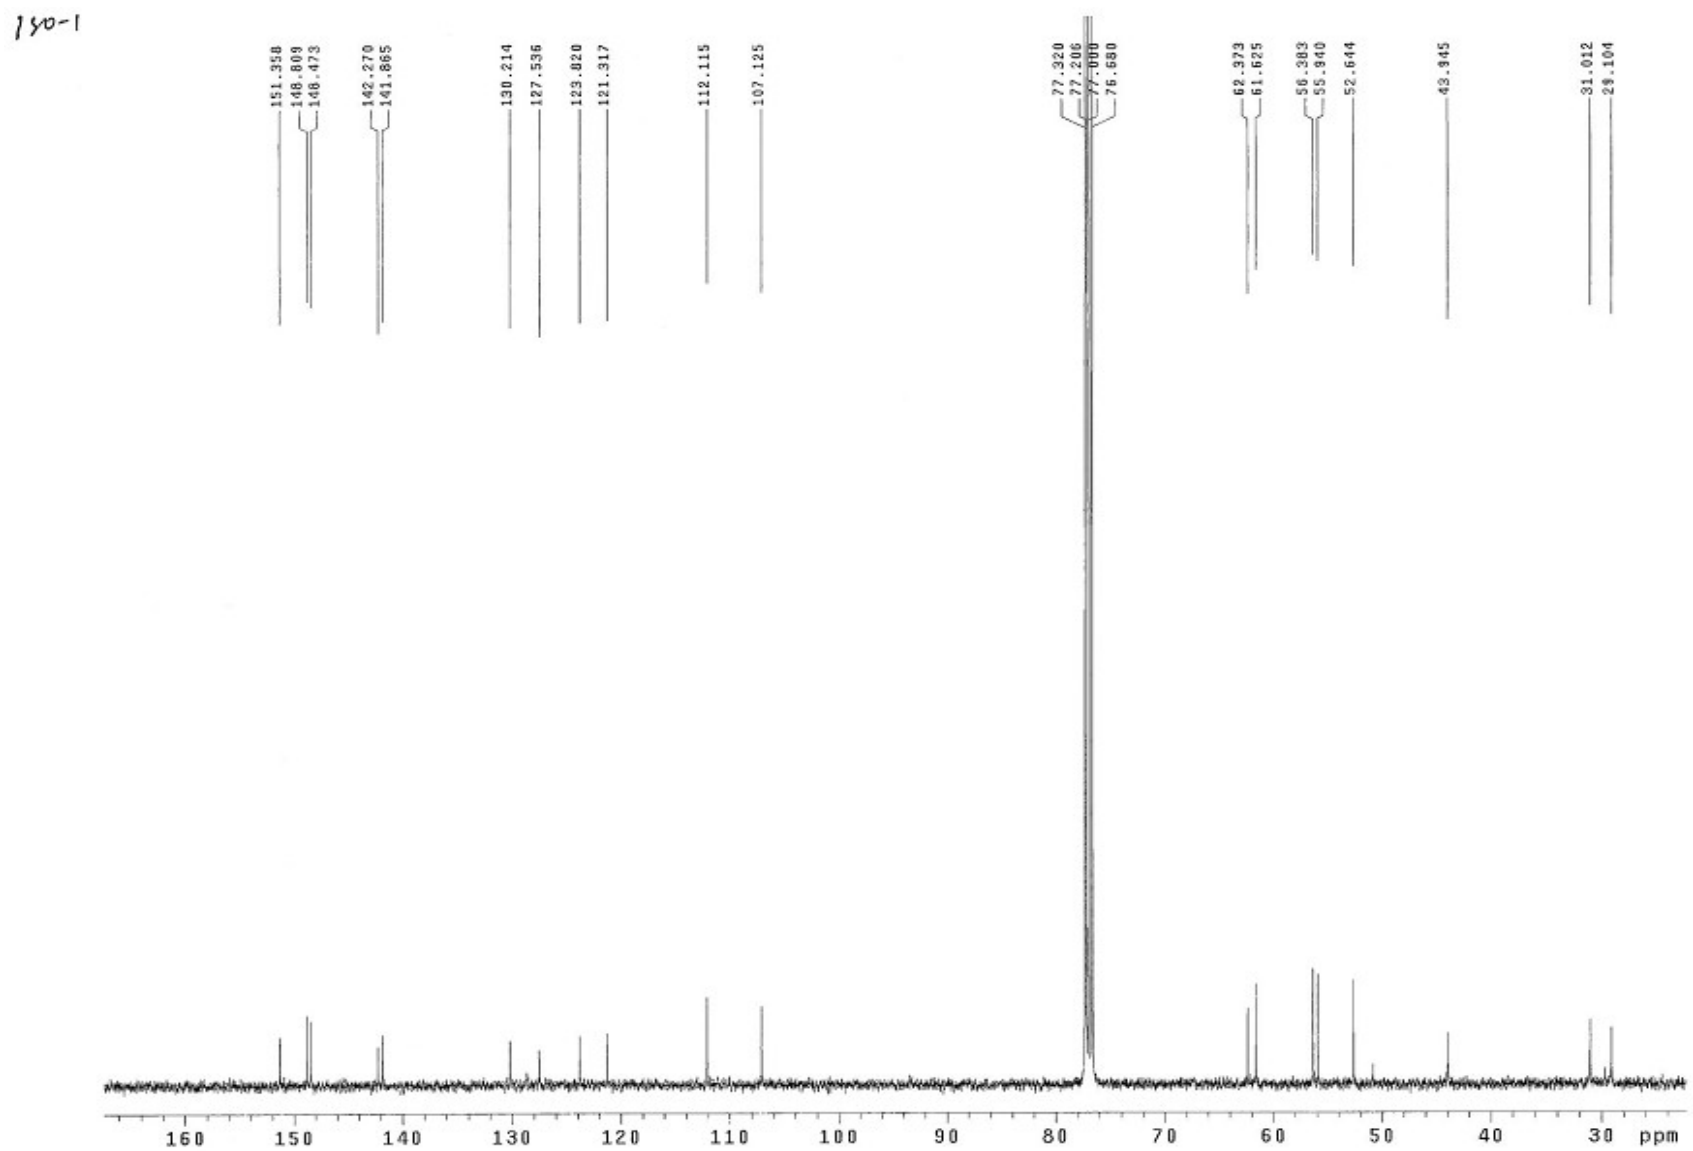

Figure S22. HRMS (ESI) spectra of 8-nitro-isocorydine (7).

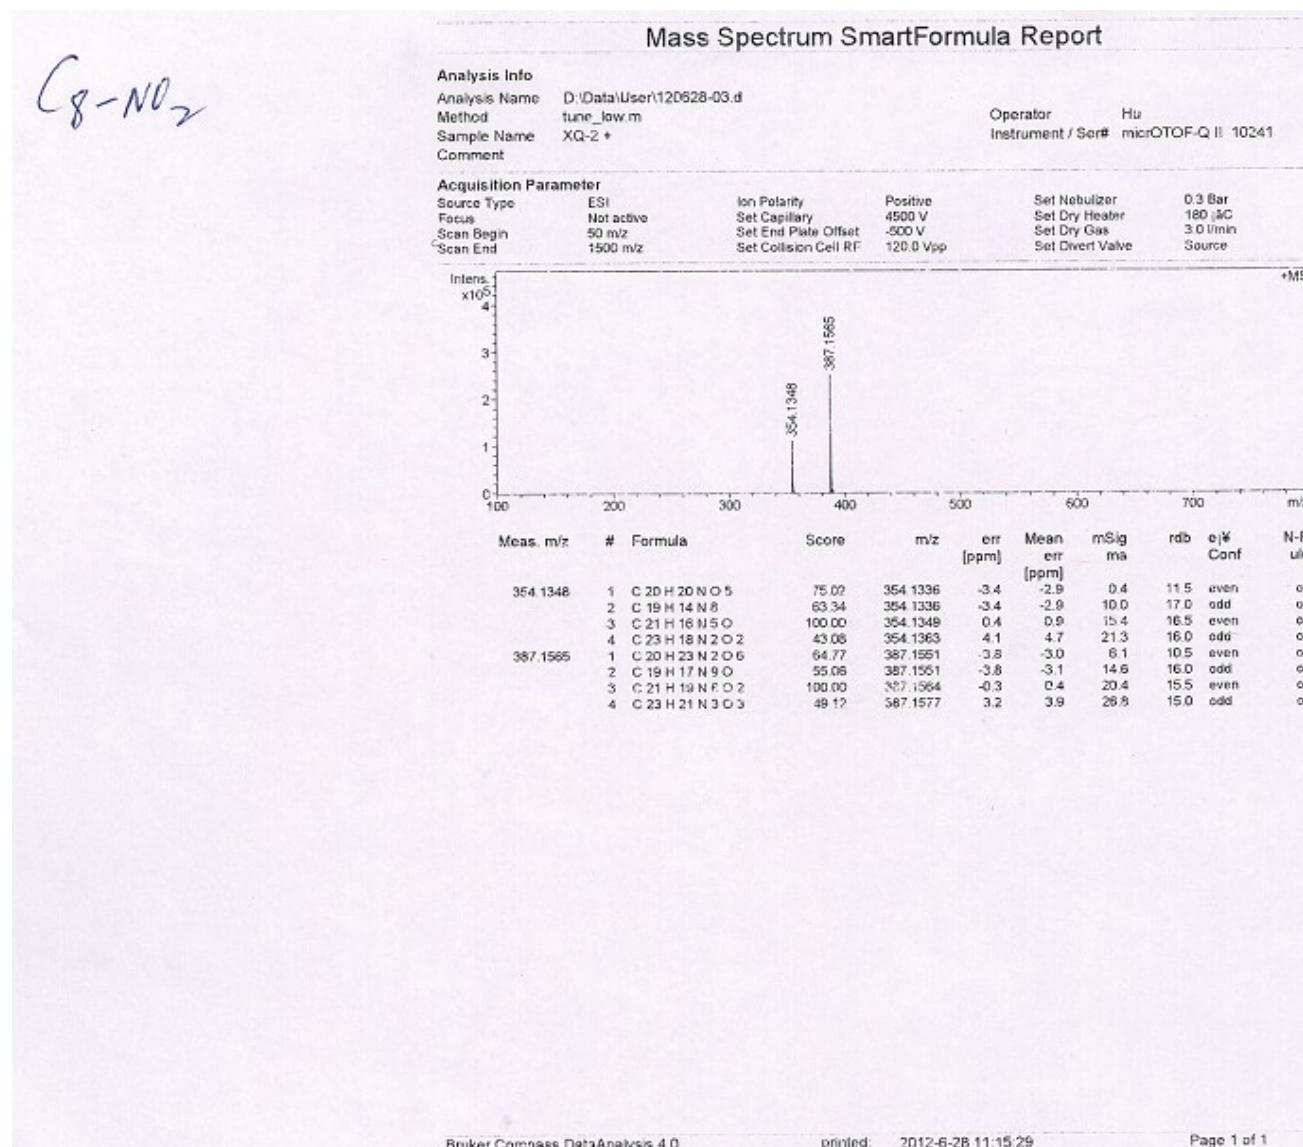

Figure S23.  $^1\text{H-NMR}$  (400 MHz,  $\text{CDCl}_3$ ) spectra of 8-amino-isocorydine (**8**).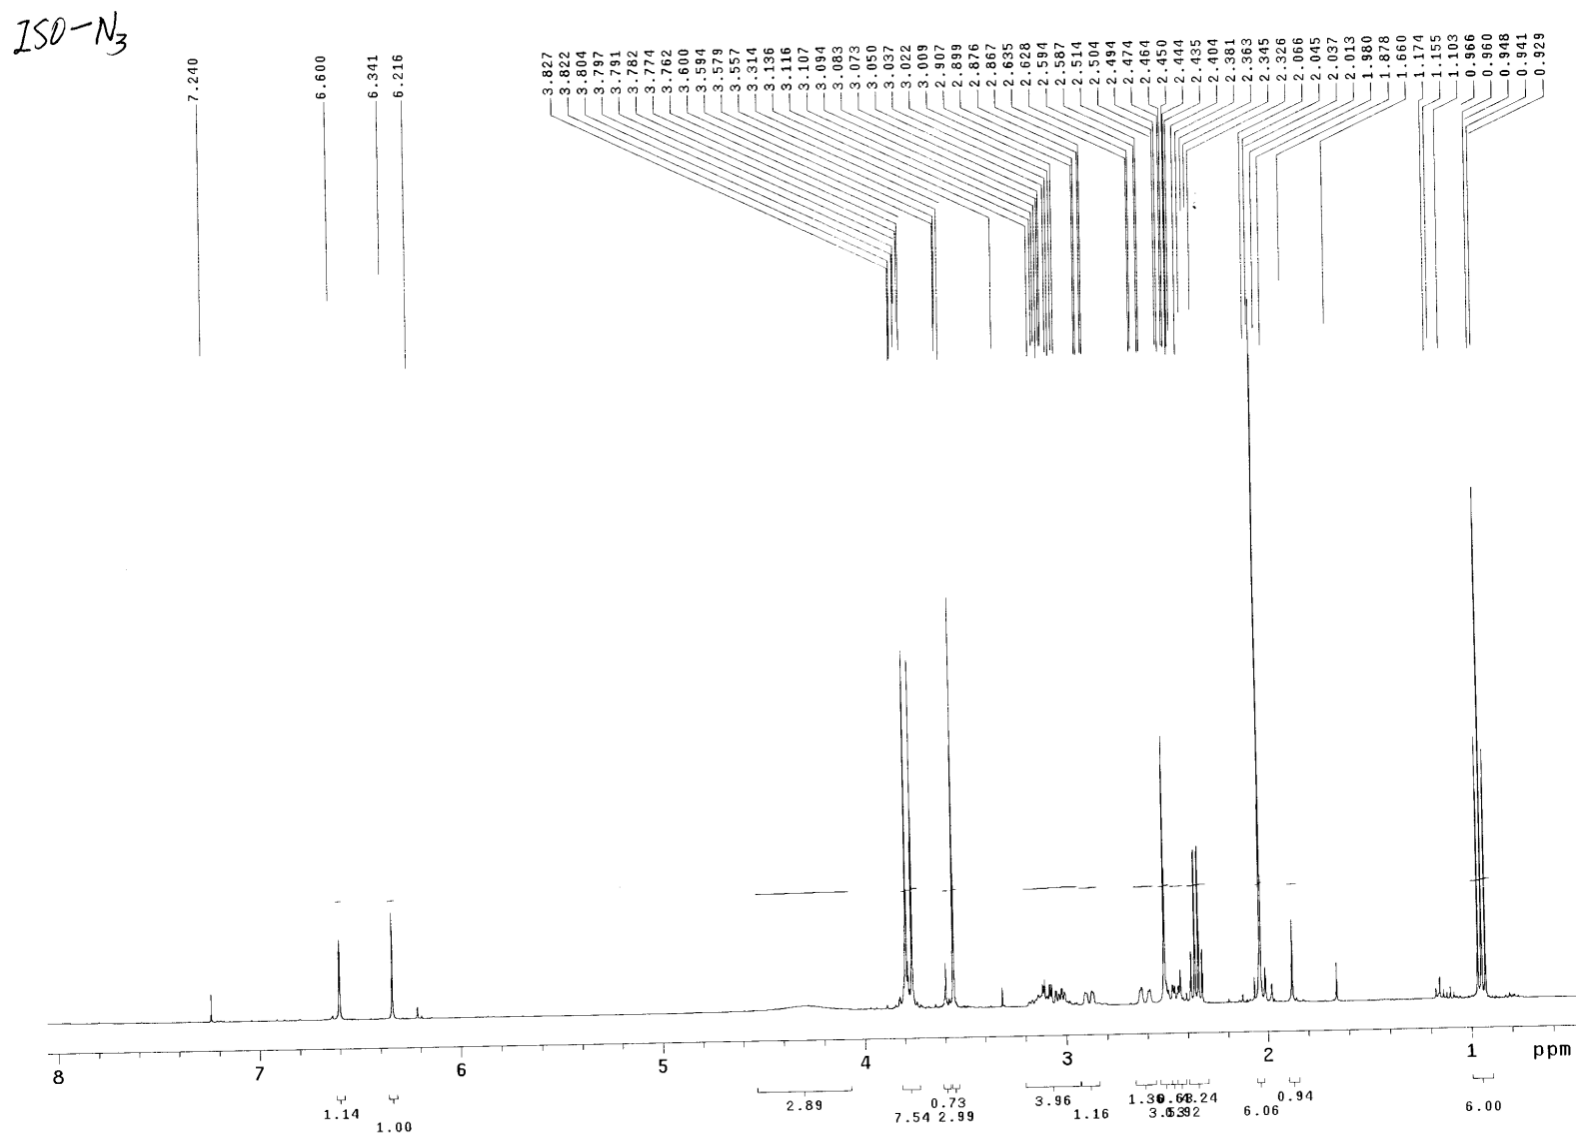

**Figure S24.**  $^{13}\text{C}$ -NMR (100 MHz,  $\text{CDCl}_3$ ) spectra of 8-amino-isocorydine (**8**).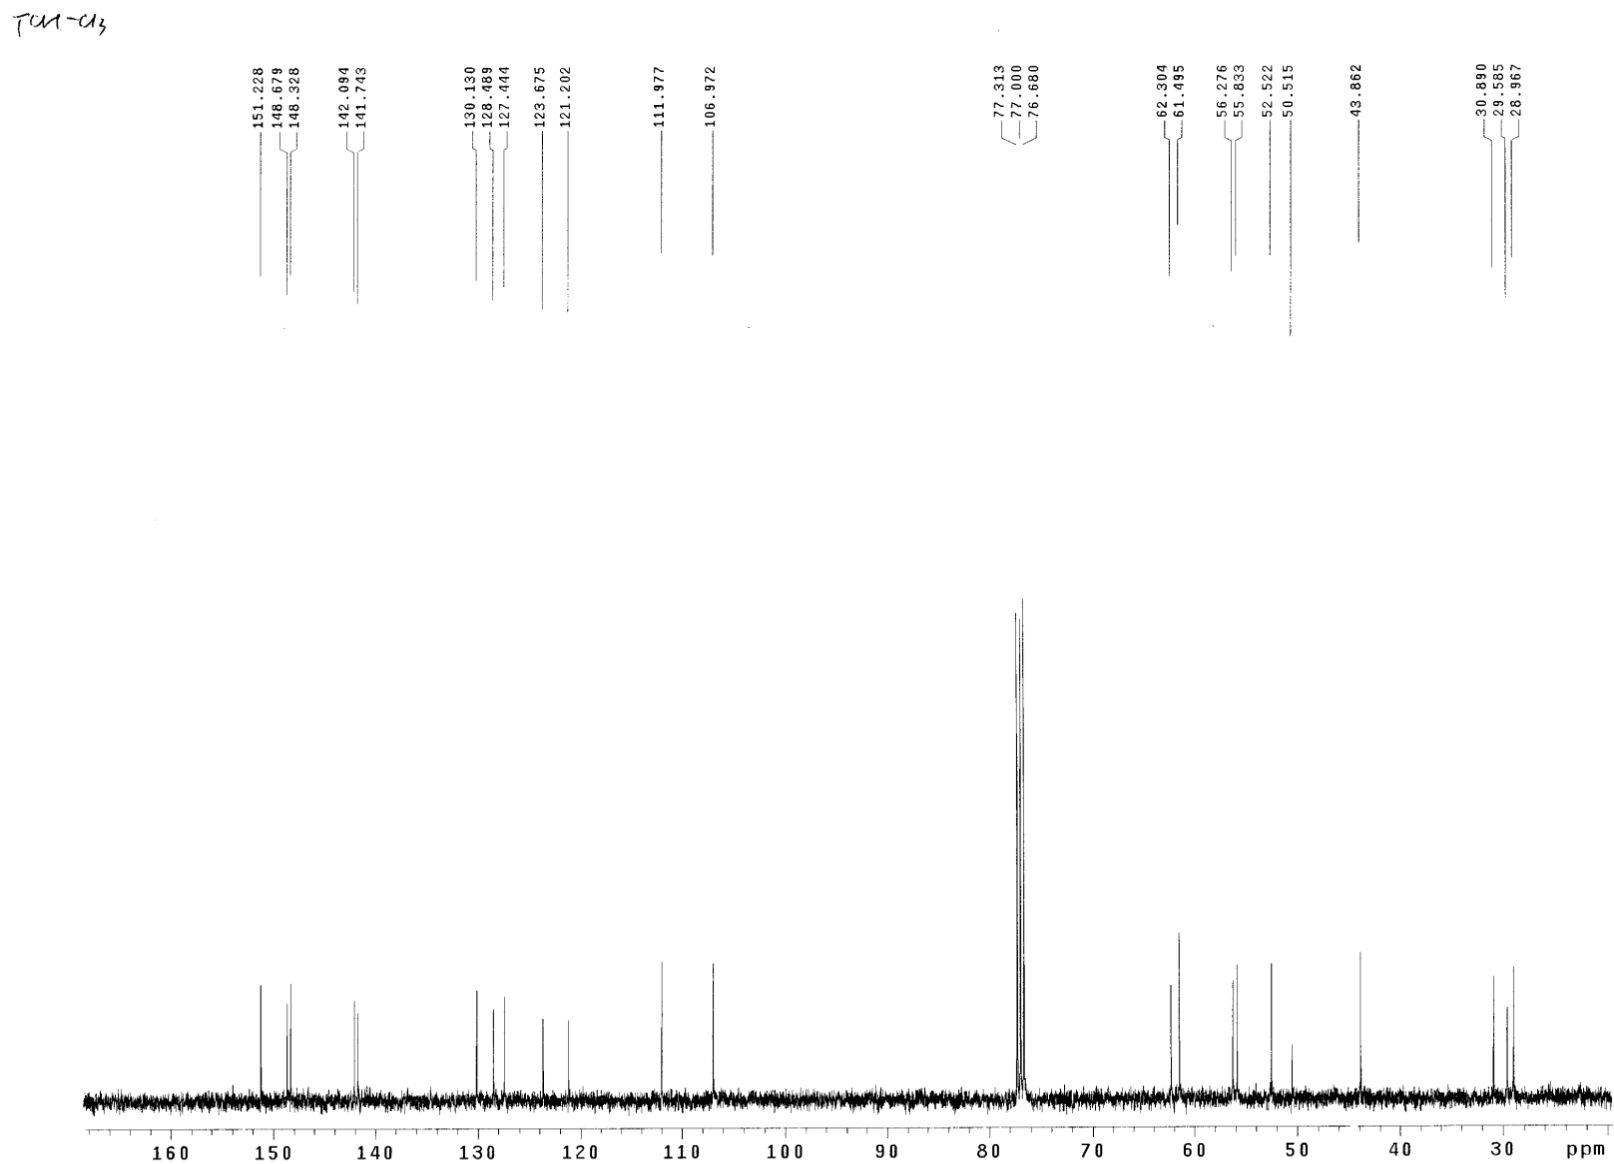

**Figure S25.** HRMS (ESI) spectra of 8-amino-isocorydine (**8**).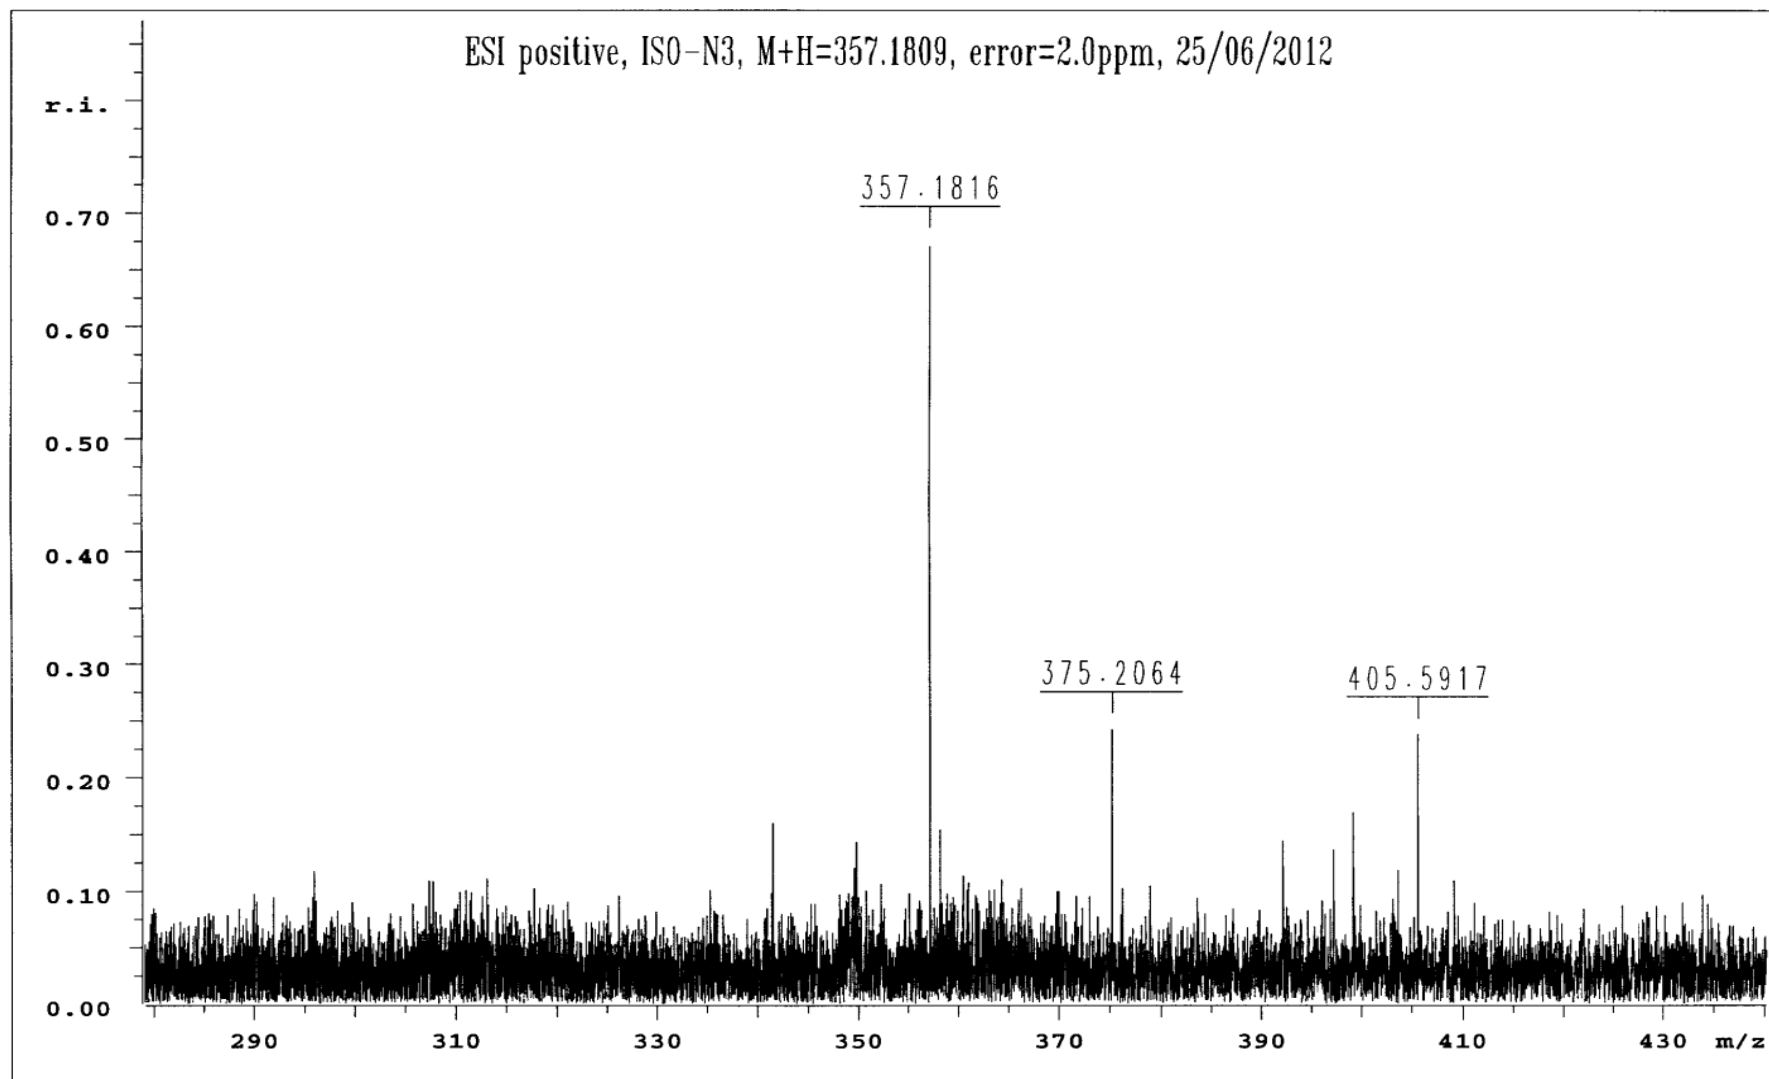



**Figure S26.**  $^1\text{H-NMR}$  (400 MHz,  $\text{CDCl}_3$ ) spectra of 8-chloro-isocorydine (**9**).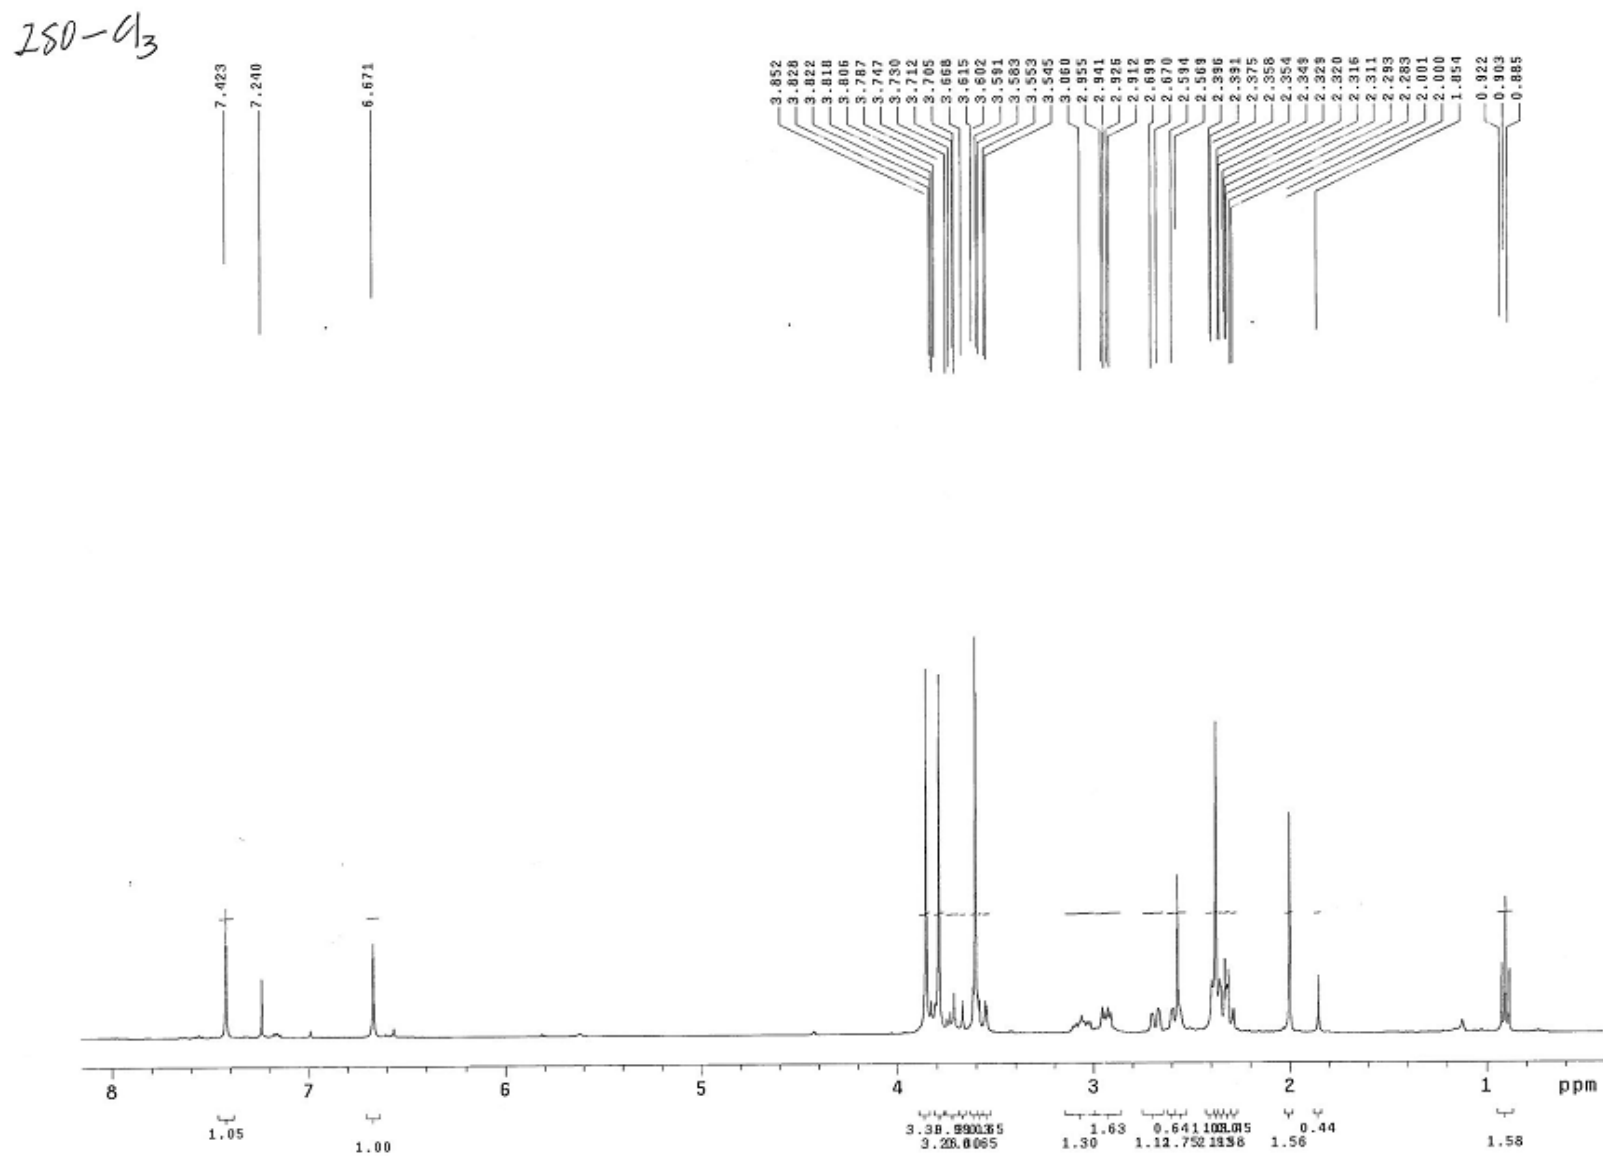

**Figure S27.**  $^{13}\text{C}$ -NMR (100 MHz,  $\text{CDCl}_3$ ) spectra of 8-chloro-isocorydine (**9**).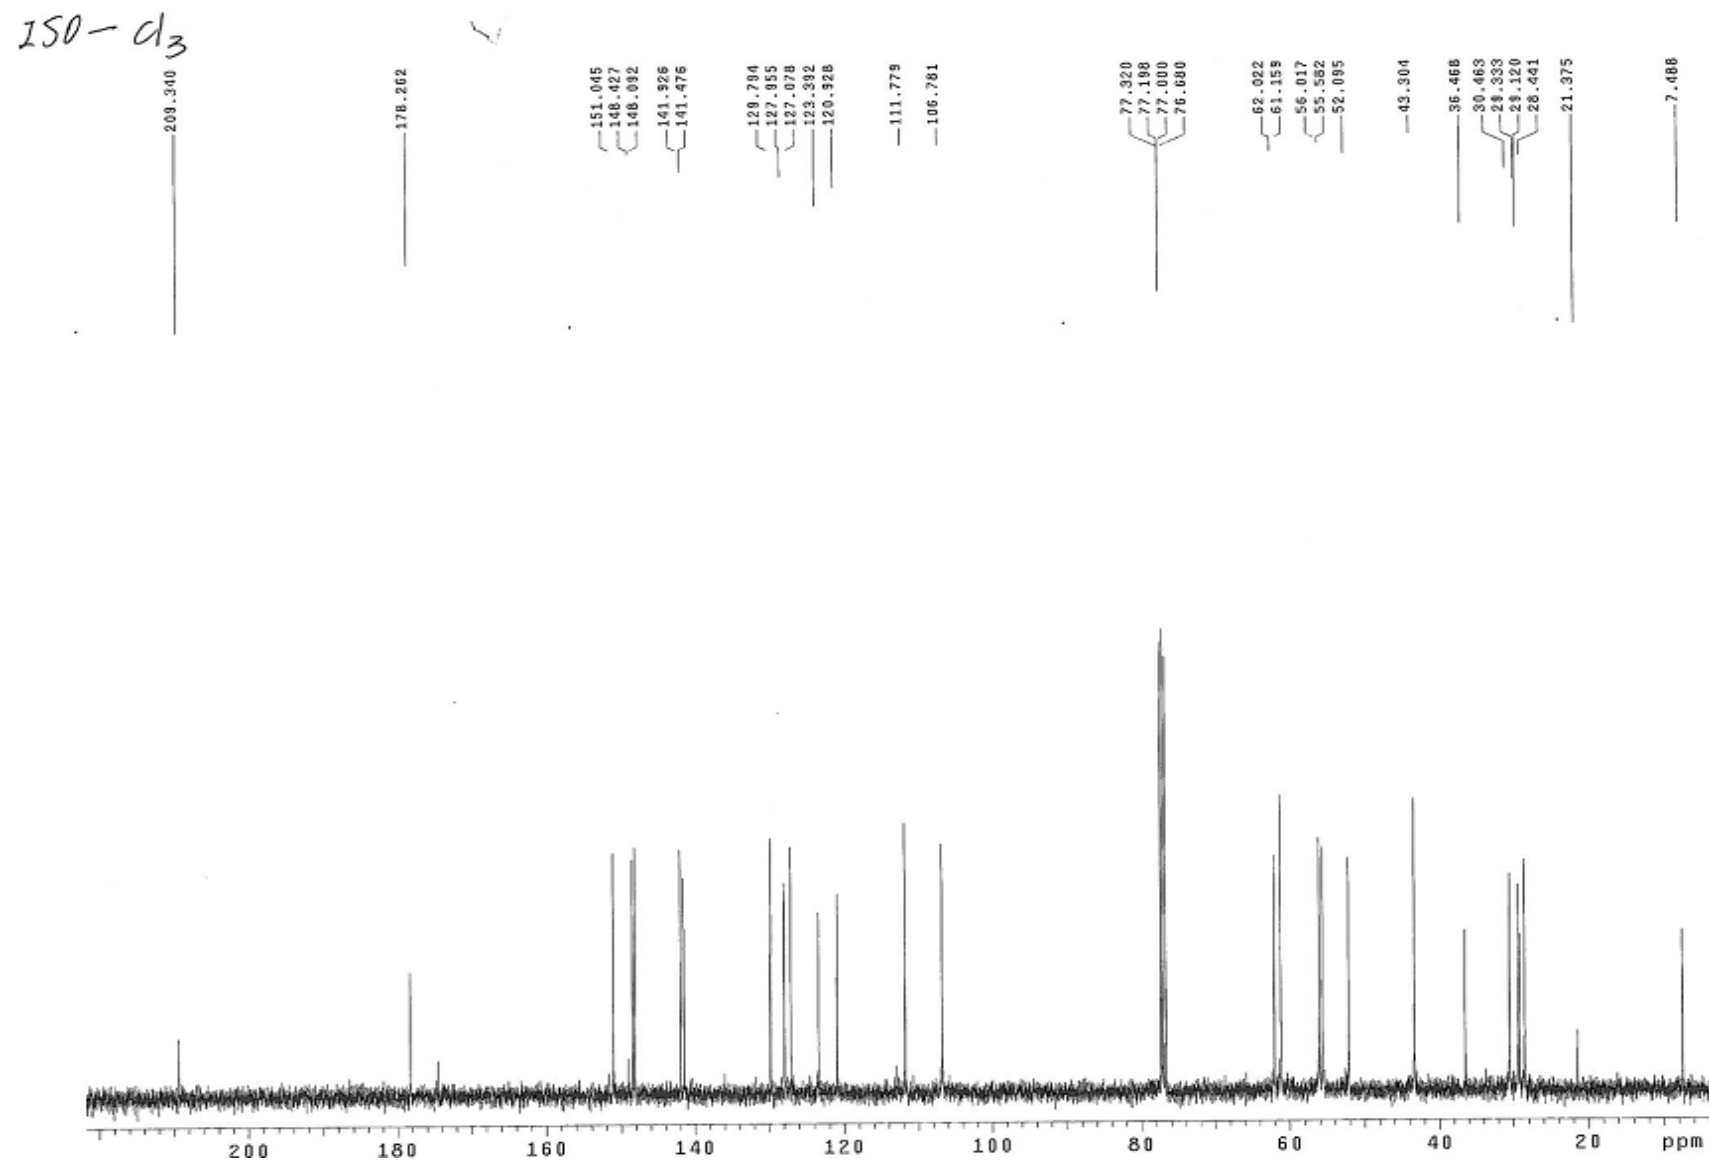

**Figure S28.**  $^1\text{H-NMR}$  (400 MHz,  $\text{CDCl}_3$ ) spectra of 6a,7-dihydrogen-isocorydione (**10**).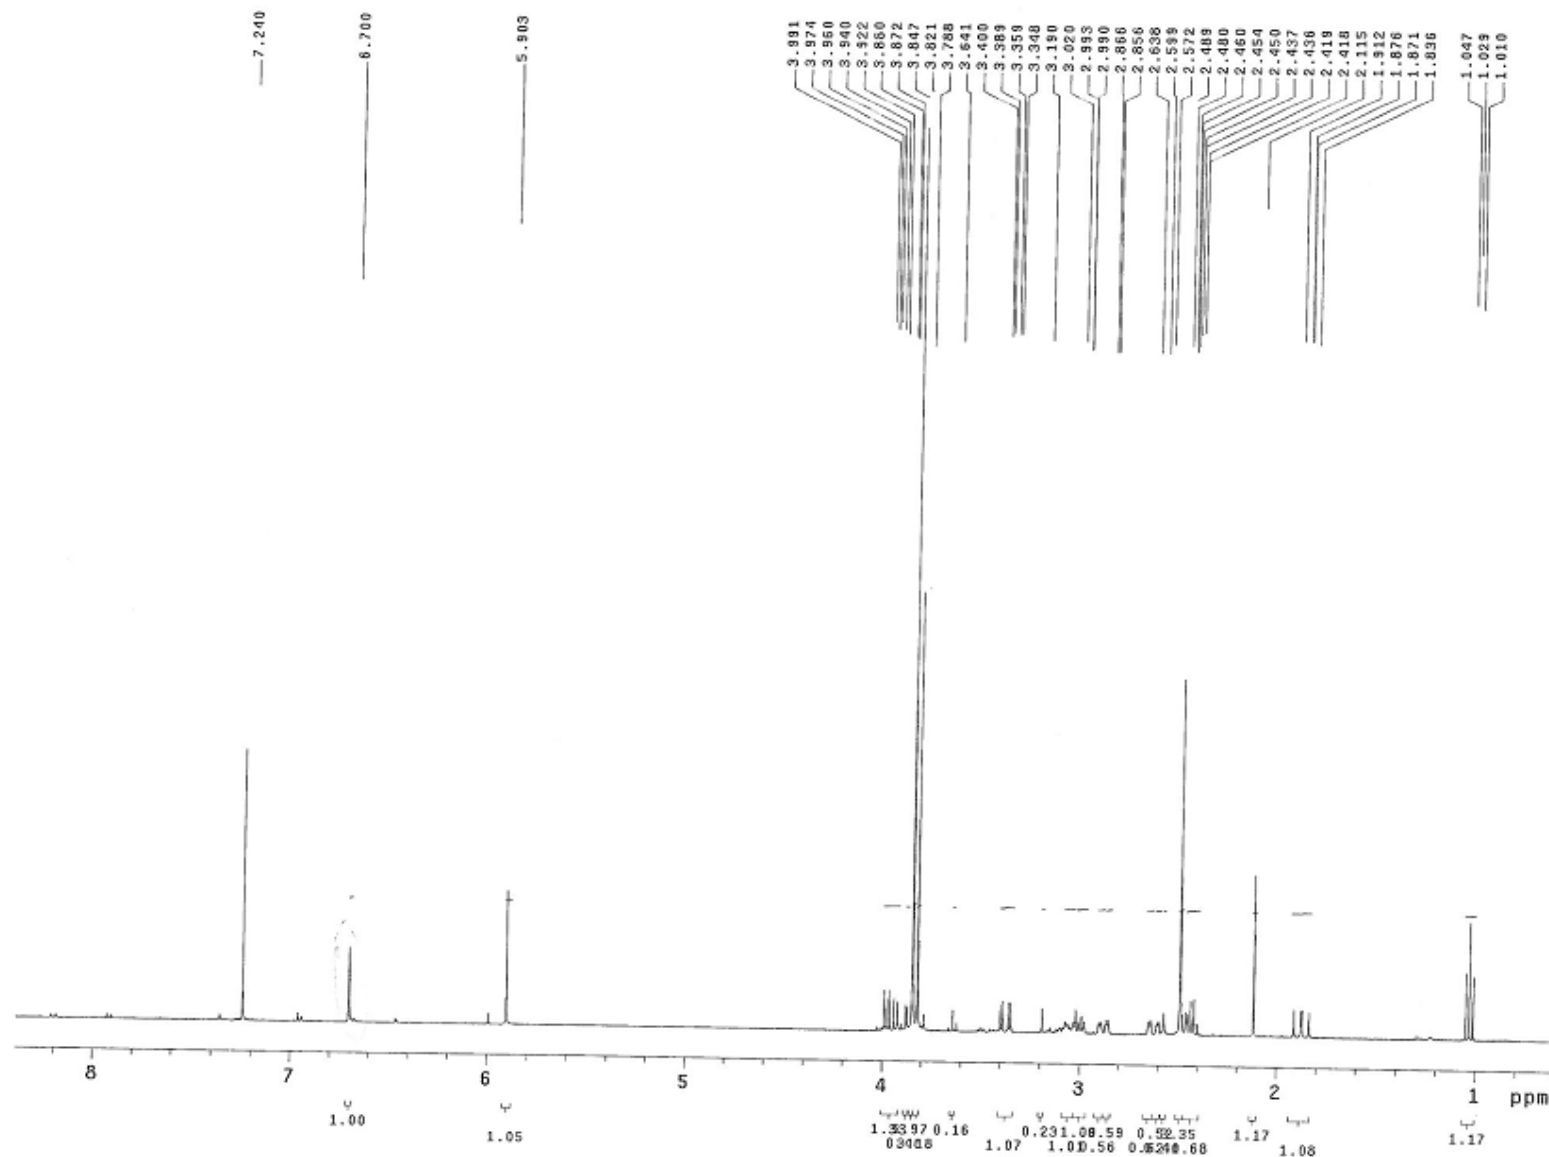

**Figure S29.**  $^{13}\text{C}$ -NMR (100 MHz,  $\text{CDCl}_3$ ) spectra of 6a,7-dihydrogen-isocorydione (**10**).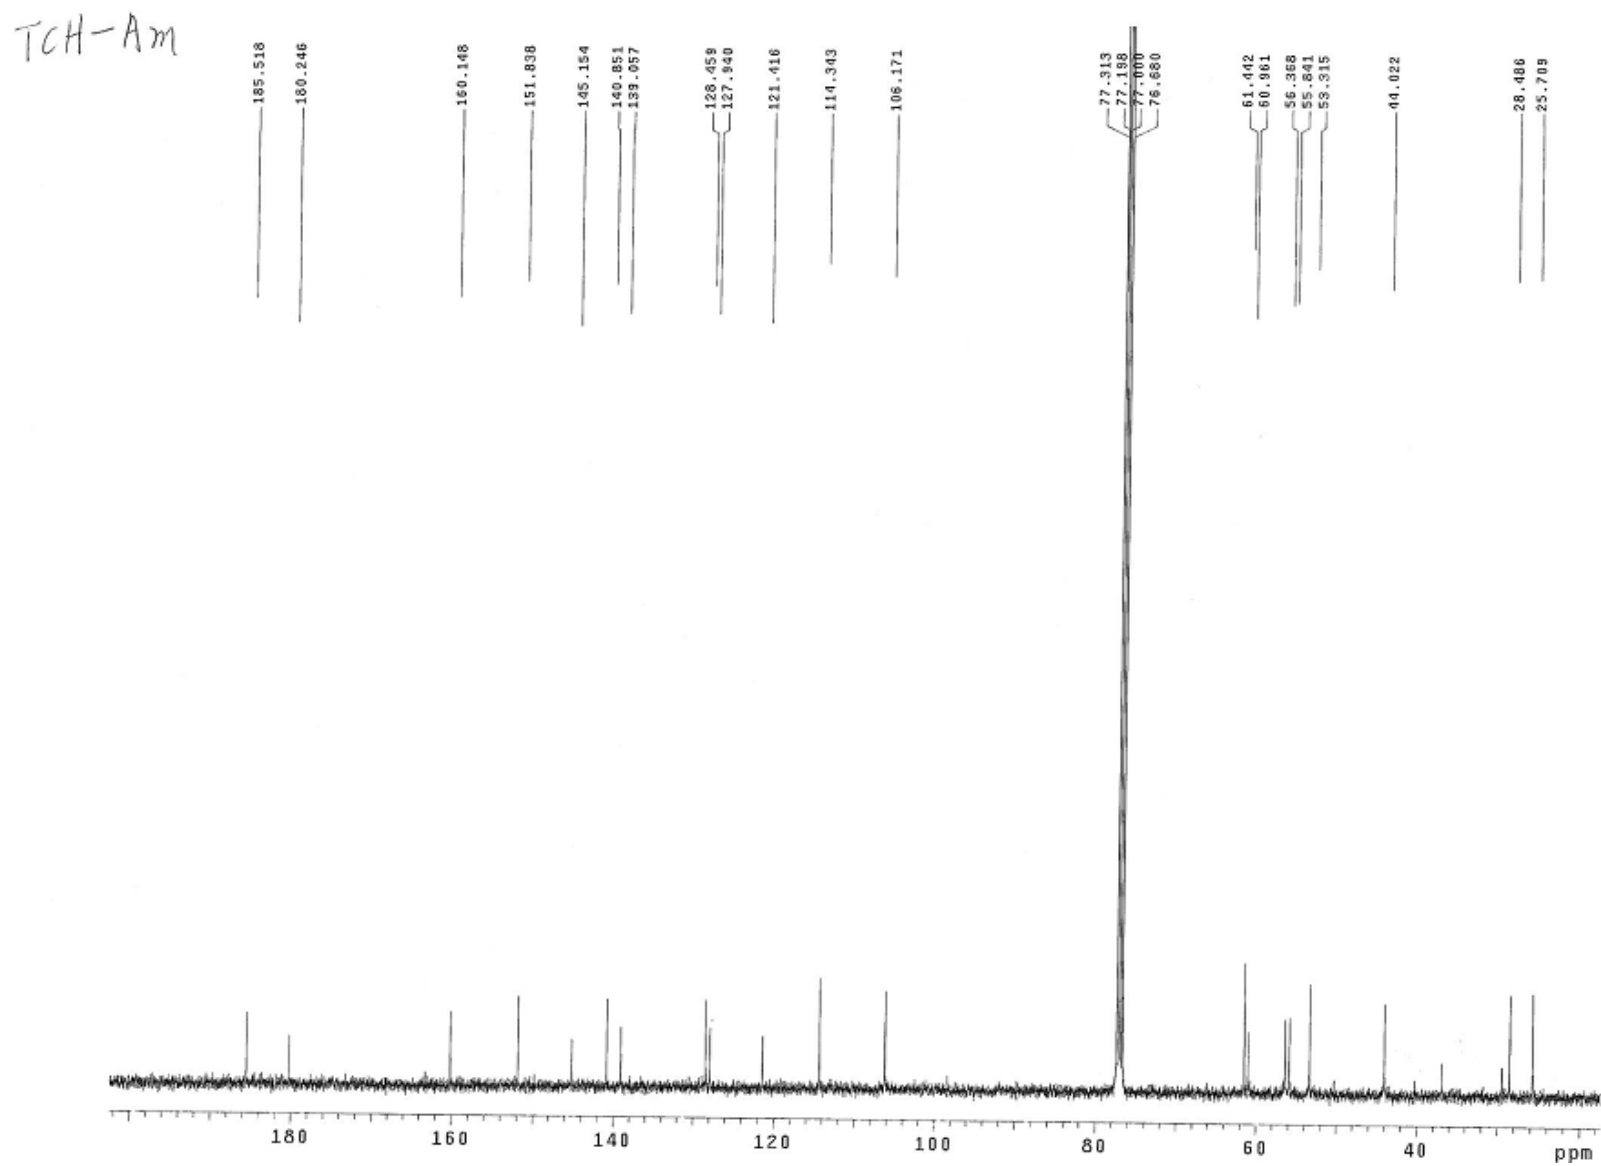

**Figure S30.**  $^1\text{H-NMR}$  (400 MHz,  $\text{CDCl}_3$ ) spectra of 8-acetamino-isocorydine (**11**).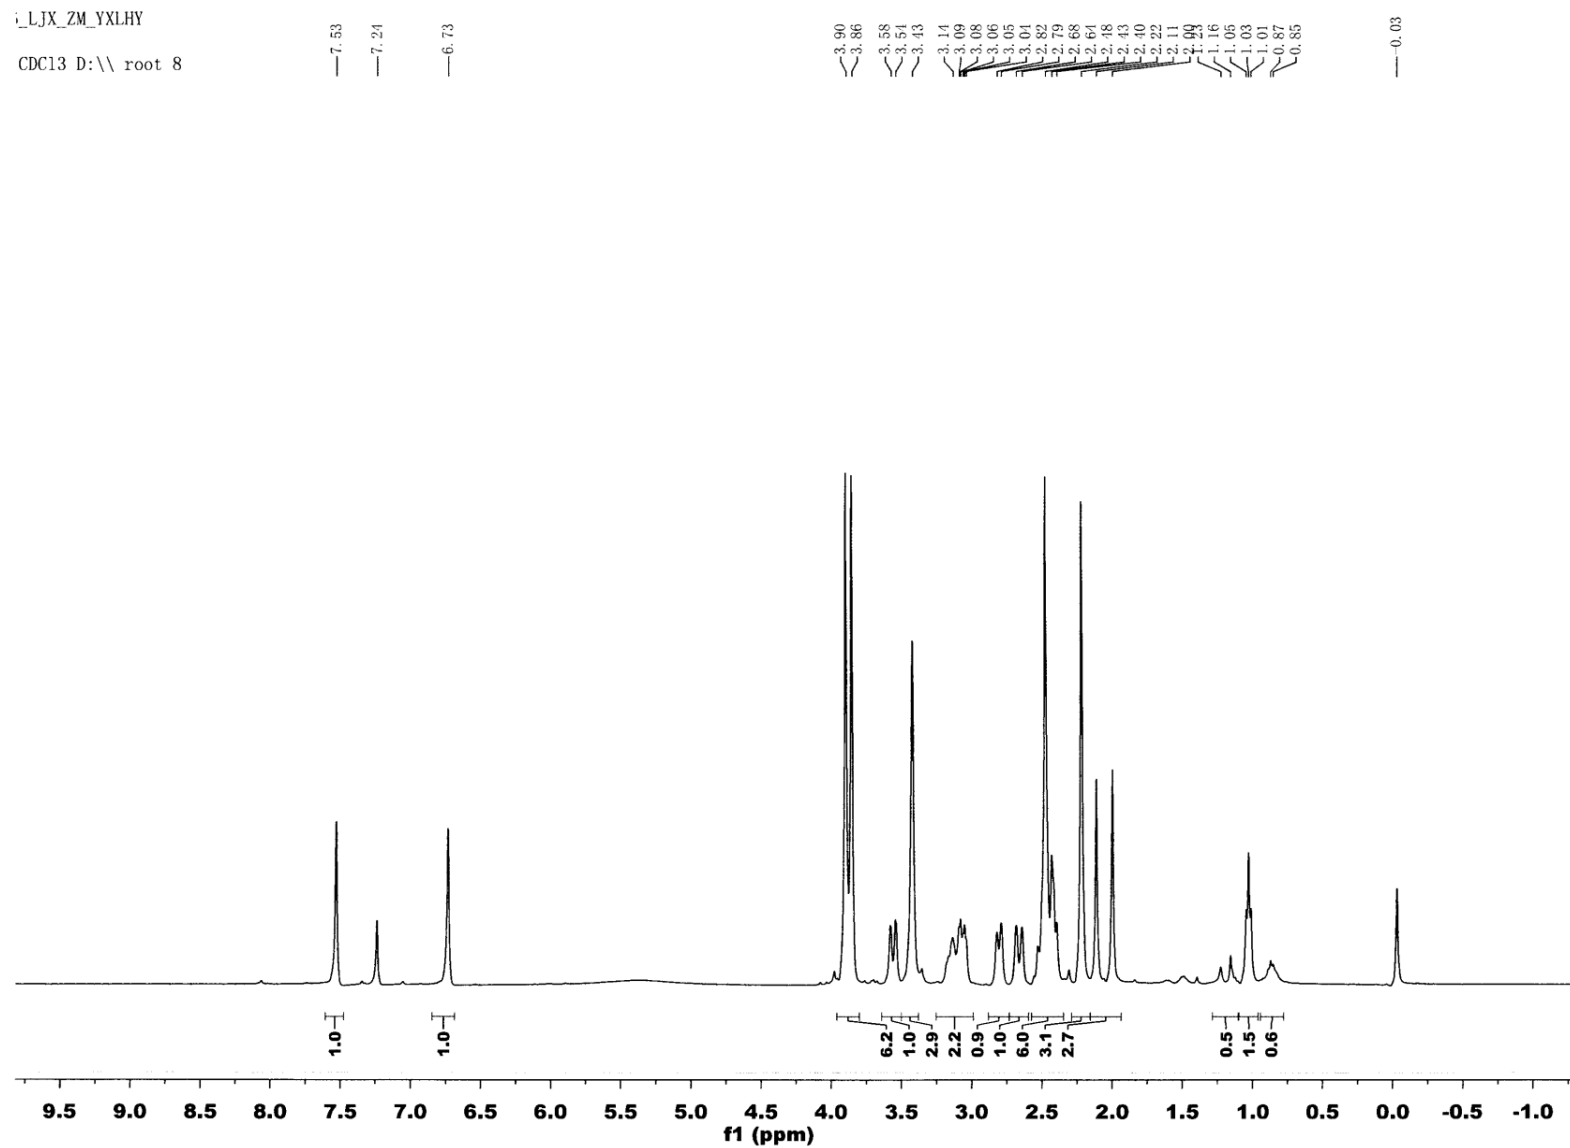

**Figure S31.**  $^{13}\text{C}$ -NMR (100 MHz,  $\text{CDCl}_3$ ) spectra of 8-acetamido-isocorydine (**11**).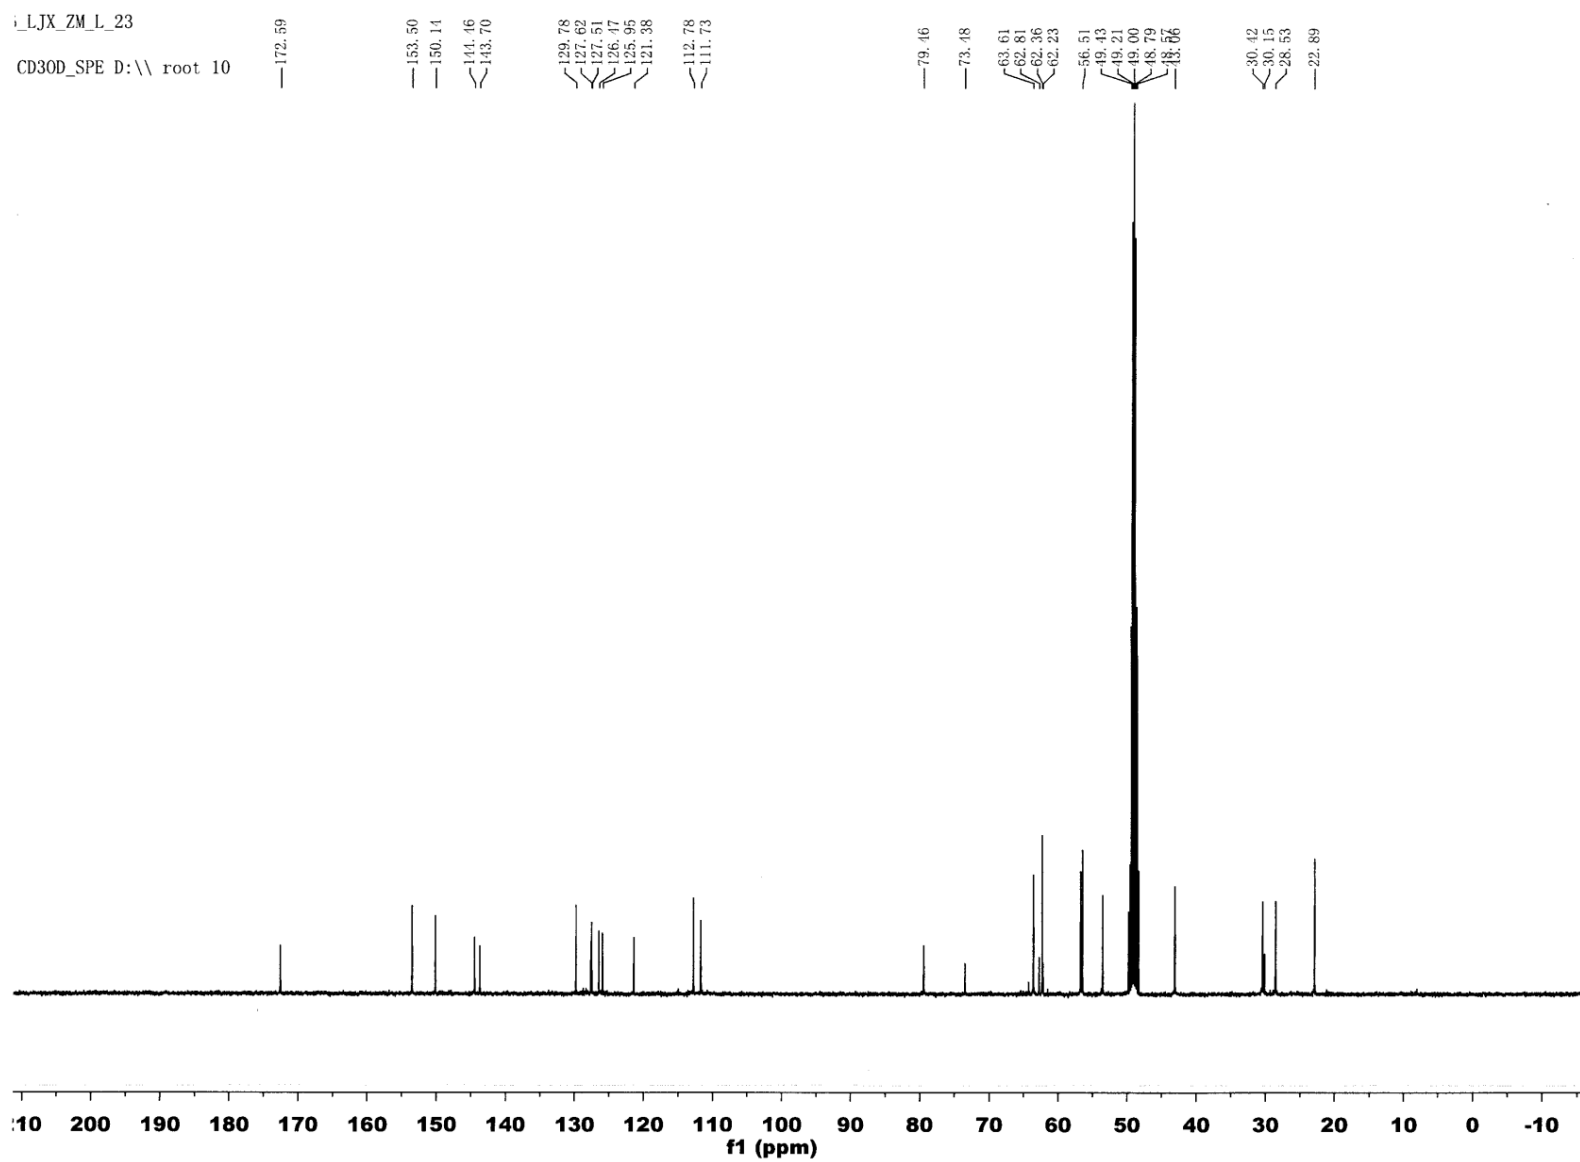

**Figure S32.**  $^{13}\text{C}$ -NMR (100 MHz,  $\text{CDCl}_3$ ) spectra of 8-acetamino-isocorydine (**11**).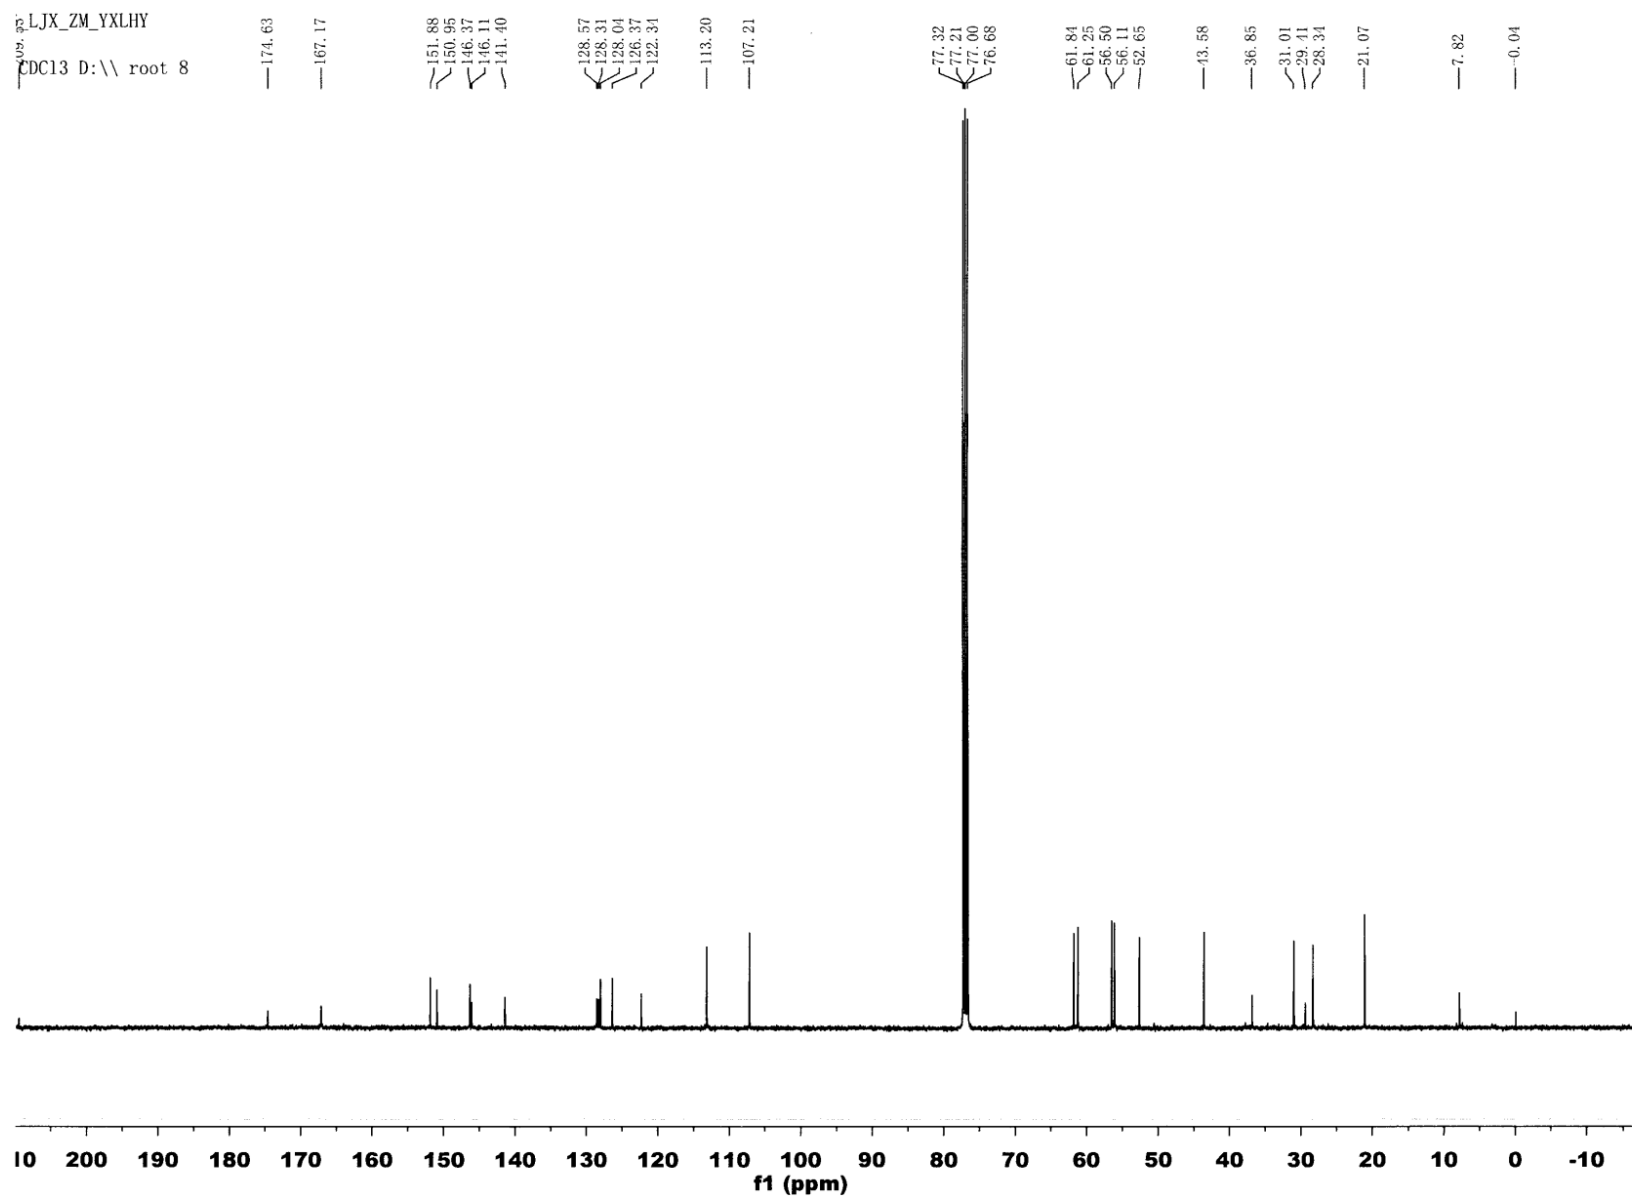

**Figure S33.** HRMS (ESI) spectra of 8-acetamino-isocorydine (**11**).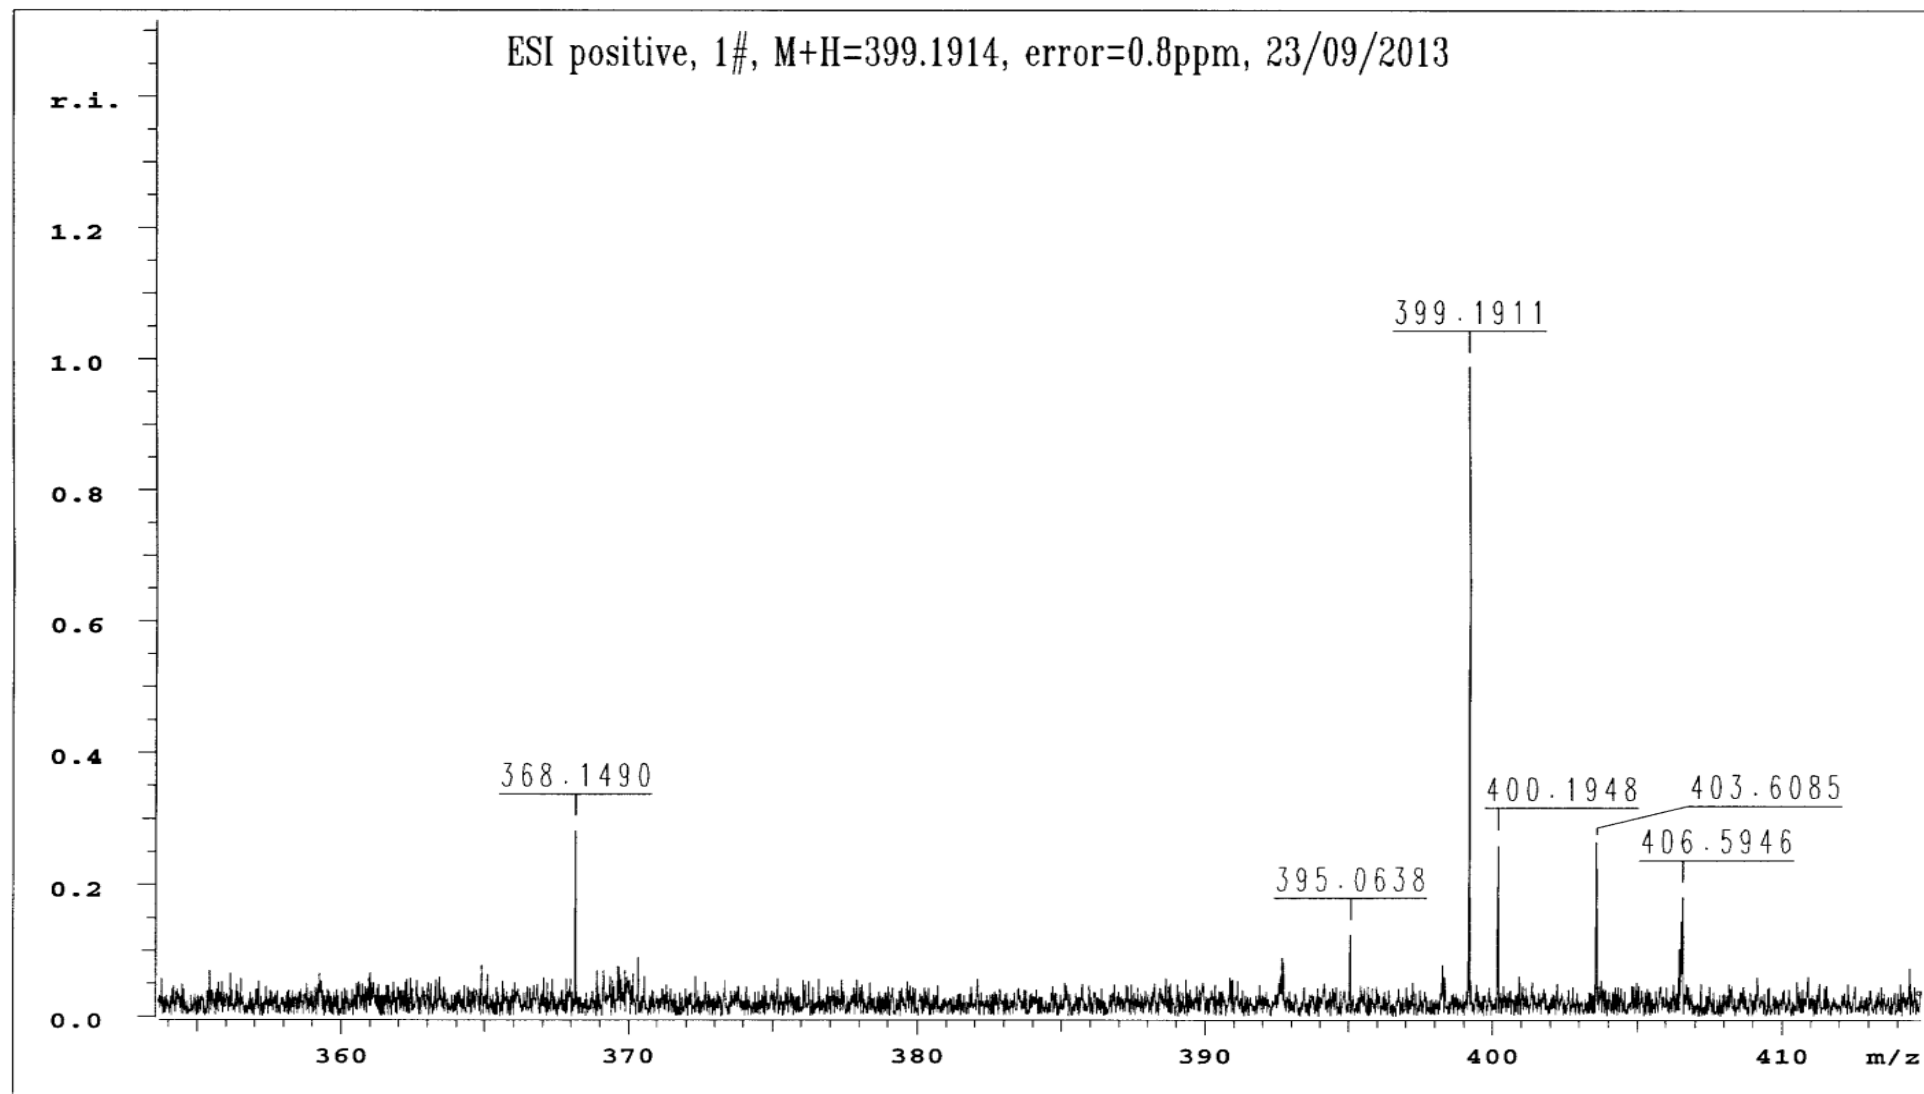

/u/data/TRAINING/zhongmei130923/1/pdata/1 xspec Mon Sep 23 22:16:07 2013
